1  
2  
3  
4  
5  
6  
7  
8  
9  
10  
11  
12  
13  
14  
15  
16  
17  
18  
19  
20  
21  
22  
23  
24  
25  
26  
27  
28  
29  
30

## Suppression of HSF1 activity by wildtype p53 creates the driving force for p53 loss-of-heterozygosity, enabling mutant p53 stabilization and invasion

Özge Cicek Sener <sup>1,#</sup>, Adrian Stender <sup>1,#</sup>, Luisa Klemke <sup>1</sup>, Nadine Stark <sup>1</sup>, Tamara Isermann <sup>1</sup>, Jinyu Li <sup>2</sup>, Ute M. Moll <sup>1,2</sup> and Ramona Schulz-Heddergott <sup>1,\*</sup>

1) Institute of Molecular Oncology, University Medical Center Göttingen, 37077 Göttingen, Germany

2) Department of Pathology, Stony Brook University, Stony Brook NY 11794, USA

\* Corresponding author: [ramona.schulz@zentr.uni-goettingen.de](mailto:ramona.schulz@zentr.uni-goettingen.de)

# contributed equally to this work

### HIGHLIGHTS

- heterozygous p53<sup>R248Q/+</sup> tumors retain p53 transcriptional activity in a mouse model of colorectal cancer (CRC)
- wildtype p53 actively represses the tumor-promoting HSF1-regulated chaperone system and proteotoxic stress response
- the repressive Wtp53 – HSF1 axis creates a selective pressure for Wtp53 loss-of-heterozygosity in CRC tumors
- p53 loss-of-heterozygosity enables stabilization of the gain-of-function p53<sup>R248Q</sup> mutant protein which in turn enables CRC invasion

31

## 32 **Abstract**

33 A prerequisite for gain-of-function (GOF) p53 missense mutants (mutp53) is protein  
34 stabilization. Moreover, a prerequisite for mutp53 stabilization is loss of the remaining wildtype  
35 (WT) p53 allele (loss-of-heterozygosity, p53LOH) in mutp53/+ tumors. Thus, GOF, mutp53  
36 stabilization and p53LOH are strictly linked. However, the driving force for p53LOH is unknown.  
37 Typically, heterozygous tumors are an instable transition state. Here we identify the repressive  
38 WTp53-HSF1 axis as the driver of p53LOH.

39 We find that the WTp53 allele in AOM/DSS-induced colorectal tumors (CRC) of p53<sup>R248Q/+</sup> mice  
40 retains its haploid transcriptional activity. Notably, WTp53 represses heat-shock factor 1 (HSF1)  
41 activity, the master transcription factor of the proteotoxic stress defense response (HSR) that is  
42 ubiquitously and constitutively activated in cancer tissues. HSR is critical for stabilizing  
43 oncogenic proteins including mutp53. WTp53-retaining murine CRC tumors and tumor-derived  
44 organoids and human CRC cells all suppress the tumor-promoting HSF1 transcriptional  
45 program.

46 Mechanistically, the retained WTp53 allele activates CDKN1A/p21, leading to cell cycle  
47 inhibition and suppression of the E2F target gene MLK3. MLK3 links cell cycle to the MAPK  
48 stress pathway to activate the HSR response. We show that in p53<sup>R248Q/+</sup> tumors WTp53  
49 activation by constitutive stress (emanating from proliferative/metabolic stresses and genomic  
50 instability) represses MLK3, consequently inactivating the MAPK-HSF1 response necessary to  
51 ensure tumor survival. This creates strong selection pressure for p53LOH which eliminates the  
52 repressive WTp53-HSF1 axis and unleashes the tumor-promoting HSF1 functions, inducing  
53 mutp53 stabilization and enabling invasion.

54

## 55 **Keywords**

56 mutp53, HSF1, Hsp90, Hsp70, CDK4, MLK3, MAPK, AOM/DSS, colorectal cancer, organoids,  
57 Idasanutlin

58

59

60

61

## Introduction

62 Colorectal cancer (CRC) is due to several driver mutations and the third leading cause of cancer  
63 deaths worldwide. TP53 mutations enable the critical transition from late adenoma to invasive  
64 carcinoma<sup>1, 2</sup>. Next to APC, TP53 mutations are the second most common alteration in sporadic  
65 CRC, affecting > 60% of cases<sup>3-10</sup>. The vast majority of TP53 alterations are missense  
66 mutations (mutp53) with hotspot codons R175, G245, R248, R273 and R282<sup>11-13</sup>. In addition to  
67 loss-of-WTp53 function (LOF), some, especially hotspot, mutp53 alleles gain broad tumorigenic  
68 gain-of-function (GOF) and actively promote aggressive cancer progression *in vivo*<sup>9, 14-20</sup>. Some  
69 GOF mutants acquire allele-specific functions, not necessarily shared by other mutants<sup>3, 9, 21-26</sup>.  
70 The GOF *TP53*<sup>R248Q</sup> allele is one of the most common across cancer types<sup>10</sup>.

71 A prerequisite for GOF is the tumor-specific stabilization of mutp53 proteins by the  
72 HSP90/HSP70/HSP40 chaperone systems<sup>27-31</sup>, providing protection from degradation by E3-  
73 ubiquitin ligases Mdm2 and CHIP<sup>32, 33</sup>. HSF1, the master transcription factor of the inducible  
74 heat-shock stress response (HSR), governs stress-induced chaperones including HSP90,  
75 HSP70 and HSP40 and is the major proteotoxic defense in tumors, preventing aberrant  
76 oncoproteins from aggregation<sup>34-36</sup>. Moreover, HSF1 induces chaperone-independent tumor-  
77 promoting genes, together imparting on HSF1 a key co-oncogenic role in tumorigenesis<sup>37-39</sup>.  
78 Notably, since cancer cells experience cumulative stress during tumorigenesis, HSF1 is  
79 increasingly activated<sup>40</sup>.

80 p53LOH is a critical prerequisite for mutp53 stabilization in tumors. Heterozygous tumors rarely  
81 if ever stabilize p53 *in vivo*<sup>9, 19, 41, 42</sup>. Importantly, the majority of human mutp53 tumors have  
82 undergone p53LOH<sup>43-47</sup>. Moreover, p53LOH has watershed significance in promoting tumor  
83 progression. Recent mouse studies clearly identify p53LOH as strong tumor promoting force<sup>41,</sup>  
84 <sup>48, 49</sup>. Our previous studies comparing sarcomas and breast cancer identified that heterozygous  
85 mutp53 tumors require a second hit for mutp53 stabilization, i.e. loss of the remaining WTp53  
86 allele<sup>41</sup>. However, the driving force behind p53LOH remained elusive.

87 Given how important mutp53 GOF activities are in tumor biology, it is imperative to understand  
88 the mechanism that drives stabilization of GOF mutants. The dependency of mutp53  
89 stabilization on p53LOH appears somehow regulated by the remaining WTp53, but its  
90 mechanism is unknown. Using a genetically controlled p53LOH system in a CRC model, we  
91 show their causal relationship. We identify that the remaining WTp53 allele in p53<sup>R248Q/+</sup> tumors  
92 represses the HSF1 chaperone axis, thereby preventing mutp53<sup>R248Q</sup> protein stabilization, GOF

93 and invasion. This creates a strong driving force for p53LOH. In sum, a single pivotal genetic  
94 event, p53LOH, simultaneously provides three major evolutionary forces to drive cancer, *i*) loss  
95 of residual WTP53 suppressor activity including the repressive WTP53-HSF1 axis, *ii*) tumor-  
96 promoting HSF1 upregulation, and *iii*) mutp53 protein stabilization which liberates GOF  
97 activities. This provides an explanation for the longstanding puzzle why p53LOH strictly  
98 correlates with mutp53 stabilization and higher tumor aggressiveness.

99

100

101

## RESULTS

### 102 **p53LOH is a prerequisite for mutp53 stabilization and invasion in colorectal cancer**

103 Stabilization of missense mutant p53 (mutp53) proteins specifically in tumor but not normal cells  
104 is a key feature and prerequisite of GOF<sup>16, 42</sup>. Since p53LOH is a critical prerequisite for mutp53  
105 stabilization in sarcomas and breast cancer<sup>41</sup>, we examined mutp53 stabilization before and  
106 after p53LOH in the colorectal AOM/DSS model<sup>9</sup>. Briefly, we combined the humanized GOF  
107 *TP53*<sup>R248Q</sup> allele (short 'p53<sup>Q</sup>') with either p53 wildtype (WT, '+') or knock-out ('-') alleles and  
108 determined the p53LOH effect on mutp53 levels (Figures S1A-B). Indeed, massive mutp53  
109 stabilization was detected in 100% of p53<sup>Q/-</sup> tumors, whereas 100% of p53<sup>Q/+</sup> tumors failed to  
110 undergo stabilization (Figure S1B). Notably, p53LOH increases tumor numbers in the p53<sup>-/-</sup> and  
111 even more so in the p53<sup>Q/-</sup> setting (Figure S1C). Notably, 100% of tumors retaining one WTp53  
112 allele (p53<sup>Q/+</sup> and p53<sup>-/+</sup>) remain noninvasive (Figure S1D). Conversely, loss of the remaining  
113 WTp53 allele (p53<sup>Q/-</sup> or p53<sup>-/-</sup>) enables invasion (Figures S1D-E). Thus, p53LOH is the critical  
114 determinant for CRC invasion.

115 To independently validate that p53LOH enables mutp53 stabilization and CRC invasion, we  
116 used a second inducible model that combines the constitutive p53<sup>Q</sup> allele with a floxed WTp53  
117 (p53<sup>fl</sup>) allele. p53<sup>Q/fl</sup> mice were crossed to *villinCreER*<sup>T2</sup> mice to generate Tamoxifen (TAM)-  
118 inducible p53LOH restricted to intestinal epithelial cells (p53<sup>Q/Δ</sup>), plus non-LOH controls (p53<sup>Q/+</sup>)  
119 (Figure 1A). Importantly, TAM-mediated p53LOH was induced uniformly at a defined tumor  
120 burden verified by colonoscopy (Figure 1B)<sup>50</sup>. Controls were (i) p53<sup>Q/fl</sup> oil-treated mice, and (ii)  
121 p53<sup>Q/+</sup> TAM-treated mice to exclude nonspecific TAM effects. At 6-8 wks post TAM, LOH tumors  
122 showed a trend towards increased tumor numbers and sizes compared to both 'no LOH' control  
123 groups (Figures 1C-D). When analyzed earlier at 3-5 wks post TAM, tumor burden had not yet  
124 increased, indicating that LOH's effect on promoting proliferation requires time and is  
125 incremental (Figure 1E).

126 Mutp53 stabilization is a critical prerequisite for mutp53 GOF<sup>9</sup>. Indeed, all p53LOH mice  
127 exhibited stabilized mutp53, in sharp contrast to mice with a retained WTp53 allele (Figure 1F).  
128 The WTp53 allele is a major barrier to tumor invasion as reported by us and others<sup>7, 9, 42</sup>. In  
129 agreement, 'no LOH' mice (oil-treated p53<sup>Q/fl</sup> and TAM-treated p53<sup>Q/+</sup> mice) never developed  
130 invasive tumors (Figure 1G). In stark contrast, induced p53LOH caused a dramatic increase in  
131 invasive tumors in the cohort from 0/27 tumors to 18/49 tumors (Figures 1G-I) and all mice  
132 harbored at least one invasive tumor. Notably, mutp53 stabilization is particularly prominent at  
133 the invasive front (Figure 1I). Moreover, in the constitutive p53LOH model, tumors lacking

134 WTP53 confirmed the dramatic increase in invasion (Figures S1D-E). In sum, while LOH only  
135 has an incremental effect on tumor proliferation, p53LOH is a dramatic gate-opener unleashing  
136 GOF by mediating mutp53 stabilization, which in turn enables invasion.

137

### 138 **The WTP53 allele in heterozygous colorectal tumors retains its activity and suppresses** 139 **the HSF1 transcriptional program**

140 While mutp53 stabilization after p53LOH is dramatic, the mechanism of tumor-specific mutp53  
141 accumulation triggered by p53LOH is incompletely understood. In agreement with other  
142 studies<sup>16, 51</sup>, loss of Mdm2 induction by the WT allele might play some role (Figure 2A, compare  
143 Mdm2 mRNA in p53<sup>Q/+</sup> vs p53<sup>Q/-</sup> tumors). However, an additional mechanism likely exists to  
144 ensure such massive stabilization after p53LOH.

145 A major pathway for tumor-specific mutp53 stabilization is the intrinsic tumor stress-induced  
146 HSF1-governed chaperone system<sup>14, 33, 35, 52, 53</sup>. In cancer cells the constitutively (phospho-)  
147 activated master transcription factor HSF1 orchestrates the major proteotoxic defense. Thus, we  
148 asked whether in heterozygous tumors the remaining WTP53 suppresses global HSF1 activity  
149 or distinct chaperone targets. This hypothesis assumes that despite the presence of a GOF  
150 allele (Q in this case), the remaining WTP53 allele at least partially retains its transcriptional  
151 activity. Thus, we treated tumor-bearing p53<sup>Q/+</sup> mice with Nutlin, a highly specific non-genotoxic  
152 p53 activator inhibiting its E3 ligase MDM2, to mimic the general activation state of WTP53 in  
153 tumors constitutively stressed by aberrant growth and metabolic stress, hypoxia and genomic  
154 instability (Figure 2B).

155 Indeed, in p53<sup>Q/+</sup> tumors Nutlin induced allele-dose dependently (haploid) WTP53 target gene  
156 expression (e.g. Cdkn1a, Gadd45a and Sfn) (Figure 2C). Interestingly, however, Mdm2  
157 expression after Nutlin only increased in p53<sup>+/+</sup> but not in p53<sup>Q/+</sup> tumors (Figure 2C), indicating  
158 that p53-regulated Mdm2 levels cannot account for the missing mutp53 stabilization in  
159 heterozygous tumors. Why Mdm2 failed to increase remains unclear. We conclude that,  
160 surprisingly, the GOF mutp53<sup>R248Q</sup> allele fails to exert a dominant-negative effect over the  
161 remaining WTP53 allele as predicted by many, mainly *in vitro*, studies<sup>54-57</sup>. Importantly, this  
162 residual WTP53 activity is sufficient to suppress canonical HSF1 target genes in p53<sup>Q/+</sup> tumors  
163 (Figure 2D). As expected from the double allelic dose, p53<sup>+/+</sup> tumors showed a stronger HSF1  
164 target gene suppression after Nutlin (Figure 2D).

165 We next tested whether simple loss of the WTp53 allele is able to activate HSF1 without Nutlin.  
166 While p53<sup>-/-</sup> vs. p53<sup>+/+</sup> AOM/DSS mice have accelerated tumor growth (larger tumor numbers  
167 and sizes, [Figures S2A-D](#)) due to reduced cell cycle inhibitory/pro-apoptotic p53 target gene  
168 expression ([Figures S2E-F](#)), only some HSF1 target genes increased ([Figure S2G](#)). Conversely,  
169 stress-activated WTp53, mimicked by Nutlin, suppresses HSF1 activity to prevent chaperone-  
170 mediated mutp53 stabilization ([Figure 2D](#)).

171 In sum, in a stressed tumor milieu activated WTp53 in heterozygous mutp53<sup>+/+</sup> tumors creates  
172 the driving force for p53LOH. p53LOH eliminates the repressive WTp53-HSF1 axis and enables  
173 activation of the broad co-oncogenic HSF1 functions, which causes mutp53 protein stabilization  
174 that in turn enables tumor growth but foremost invasion.

175

### 176 **Activated WTp53 represses HSF1 activity in human colorectal cancer cells**

177 Since mutp53 stabilization specifically arises in the malignant epithelial compartment, we  
178 analyzed the mechanism of p53-mediated HSF1 suppression in human CRC cell lines harboring  
179 WTp53. We resorted to homozygous WTp53 lines because heterozygous human CRC lines are  
180 not readily available. Importantly, measuring the global HSF1-mediated HSR response by heat-  
181 shock response element (HSE) luciferase assay confirmed HSF1 suppression upon WTp53  
182 activation by Nutlin ([Figure 3A](#)). Moreover, Nutlin-induced HSF1 suppression was rescued by  
183 shp53-mediated depletion, confirming that the Nutlin-induced effect is p53-specific ([Figure 3B](#)).

184 HSF1 not only orchestrates the cellular chaperone system. In cancer cells HSF1 also broadly  
185 upregulates a large palette of tumor-promoting genes involved in cell cycle, DNA repair,  
186 metabolism, adhesion and protein translation<sup>34</sup>. Thus, we analysed randomly selected HSF1  
187 targets representing different functions ([Figure 3C](#)). Notably, upon p53 activation by Nutlin we  
188 observed repression of classic HSF1 targets including *HSP90AA1*, *HSPA1A*, *HSPH1* and  
189 *HSPB1*, validating the mouse model ([Figure 3C](#)). Moreover, Nutlin also suppressed the tumor-  
190 promoting HSF1 targets *CDC6*, *ITGB3BP*, *RBBP5*, *BST2* and *FBLN1* ([Figure 3C](#)). Importantly,  
191 p53 depletion by siRNAs rescued their repression, confirming that p53 specifically regulates  
192 HSF1 activity ([Figures 3D, S3A](#)). The critical phosphorylation site for HSF1 activation is residue  
193 Ser326 which serves as functional hallmark of the tumor-promoting HSR response<sup>37, 58</sup>.  
194 Concomitantly to HSF1 target gene repression, p53 activation profoundly reduced pSer326-  
195 HSF1 levels in HCT116, RKO ([Figure 3E](#)), LS513 and LS174T cells ([Figure S3B](#)). Again, p53



196 depletion by siRNAs (Figure S3C) or p53 deletion in isogenic HCT116 cells (Figure S3D)  
197 abolished pSer326-HSF1 dephosphorylation. Conversely, mutp53-harboring CRC cells failed to  
198 repress HSF1 after Nutlin (Figure S3E). Of note, total HSF1 protein remained unchanged,  
199 excluding that HSF1 dephosphorylation/ inactivation is simply a consequence of reduced total  
200 HSF1 levels (Figure S3C). Consequently, HSF1 inactivation reduced heat-shock protein  
201 expression such as Hsp90 $\alpha$  and Hsp27 (Figure 3F). Moreover, HSP90 clients including c-Raf,  
202 AKT and Bcl-xl also destabilized, confirming the inactivation of the HSF1-HSP90 anti-  
203 proteotoxic defense response upon p53 activation (Figure 3F).

204 To further strengthen the evidence for this repressive Wtp53-HSF1 axis, we generated stable  
205 HSF1-overexpressing HCT116 clones, functionally confirmed by increased levels of pSer326-  
206 HSF1 (Figure 3G) and higher expression of HSF1 target genes (Figure S3F). Again, Nutlin  
207 strongly dephosphorylated pSer326-HSF1 (Figure 3G) and down-regulated the increased HSF1  
208 target gene response in these clones (Figure S3F). To finally demonstrate that HSF1 is directly  
209 controlled by Wtp53, we used heat-shock, the strongest known HSF1 activator, to massively  
210 increase endogenous HSF1 activity in human CRC cells. Again, Nutlin strongly repressed HSF1  
211 activity, demonstrating how potently Wtp53 counter-regulates even the strongest HSF1  
212 activator (Figures 3H-I). In sum, the HSF1-mediated stress response is strongly attenuated by  
213 activation of Wtp53.

214

### 215 **p53 blocks HSF1 activity via p21-mediated cell cycle inhibition in human CRC cells**

216 To gain further insight into Nutlin-induced HSF1 repression, we analyzed *CDKN1A*/p21, a key  
217 p53 target gene and potent cyclin-dependent kinase inhibitor that mediates cell cycle arrest  
218 (Figure S4A). Indeed, p21 depletion by siRNAs abolished pSer326-HSF1 dephosphorylation  
219 (Figure 4A) and nearly reversed Nutlin-induced HSF1 target gene repression (Figures 4B, S4B),  
220 indicating a p53-p21-mediated HSF1 suppression.

221 Next we asked whether the p53/p21-mediated HSF1 suppression is linked to and regulated by  
222 the cell cycle. *CDKN1A*/p21 binds and inhibits cyclin-dependent kinases (CDKs), thereby  
223 preventing phosphorylation of the retinoblastoma protein (RB). Hypo-phosphorylated RB binds  
224 to and inhibits E2F transcription factors preventing S-phase entry<sup>59</sup>. Thus, we tested whether  
225 cell cycle inhibitors like CDK4/6 inhibitor Palbociclib phenocopy the p53-p21-mediated HSF1  
226 inactivation. Indeed, both Nutlin- and Palbociclib-treated cells exhibited markedly decreased



227 levels of pSer326-HSF1 in WTP53 cells (Figure 4C). Moreover, HSF1 targets were suppressed  
228 by Palbociclib, mimicking the Nutlin-induced HSF1 response (Figure 4D). In further support,  
229 Nutlin-derivatives RG7112 and RG7388 (Idasanutlin) also reduced pSer326-HSF1 (Figures 4E-  
230 F). Likewise, in HSF1-overexpressing HCT116 clones cell cycle inhibition by Palbociclib (like  
231 Nutlin) repressed pSer326-HSF1 levels (Figure 4G) and target gene expression (Figure 4H).

232 To pinpoint the specific CDKs involved in activating HSF1, we used RO3306 (inhibits CDK1 and  
233 CDK2 at lower concentrations but CDK4 at higher concentrations) and Roscovitine (inhibits  
234 CDK1, CDK2, CDK5 and CDK7, but poorly CDK4/CDK6). Of note, only RO3306 at higher  
235 concentrations blocked pSer326-HSF1 like Nutlin and Palbociclib did (Figure 4I), indicating a  
236 specific role for CDK4/6 in HSF1 activation. Overall, these data demonstrate that cell cycle  
237 inhibition via p53-induced p21-CDK4/6 signaling suppresses HSF1 activity.

238

### 239 **WTP53 activation represses MLK3. MLK3 links cell cycle to the MAPK stress pathway to** 240 **activate the HSF1 response**

241 The HSF1 stress response is markedly attenuated by CDK4/6 inhibition (Figure 4). Thus, we  
242 tested whether E2F target genes like CDK1, CDK2, CDC25C, PLK4 and MLK3 control the  
243 HSF1-mediated HSR. Indeed, these E2F targets are all strongly repressed by Nutlin-activated  
244 p53, an effect largely rescued by concomitant p53 depletion (Figure 5A). Specifically, MLK3  
245 depletion mimicked the Nutlin response and reduced both pSer326-HSF1 (Figure 5B) and HSF1  
246 target gene expression (Figures 5C-D). Notably, MLK3 directly signals to the MEK/ERK stress  
247 pathway<sup>60-62</sup> and MEK/ERK activates HSF1 by phosphorylation<sup>35, 63, 64</sup>. In contrast, depletion of  
248 CDK1 or CDK2 failed to reduce pSer-325 HSF1 (Figures S5A-B). Moreover, PLK4 protein was  
249 not diminished after silencing, albeit PLK4 mRNA was strongly reduced, pointing to a stable  
250 PLK4 protein but excluding PLK4 as HSF1-activating kinase (Figures S5C, D). In contrast,  
251 MLK3 depletion reduced both pSer326-HSF1 and MEK phosphorylation (Figure 5B), revealing a  
252 MLK3-MEK-HSF1 signaling axis.

253 Importantly, MLK3 mRNA and protein levels were reduced after p53 activation (Nutlin and  
254 RG7112, Figures 5A-B, E-F, S5E) and cell cycle inhibition (CDK4i and RO3306, Figures 5E-G),  
255 concomitant with MEK inactivation (pMEK1, Figures 5E-G). Thus, we confirmed the MAPK  
256 pathway as major HSF1 activator in human WTP53 harboring CRC cells. Taken together, we  
257 identified MLK3 as upstream link between cell cycle and the MAPK stress pathway to activate

258 HSF1. WTp53 activation represses MLK3, which in turn inactivates the MAPK stress pathway  
259 and consequently the HSF1 response.

260

261 **In human colorectal cancer p53LOH combined with missense mutp53 tends to shorten**  
262 **patient survival and upregulate HSF1 activity**

263 Tumors strongly depend on constitutively upregulated chaperones to manage pervasive  
264 proteotoxic stress. However, functional WTp53 prevents adaptive upregulation of the HSF1  
265 chaperone system (Figures 2-5). Thus, to survive and progress, tumors are under strong  
266 selection pressure to undergo p53LOH<sup>65</sup> and lose WTp53-mediated HSF1 repression. This  
267 scenario was confirmed in human CRC. p53LOH occurred in ~80% of patients harboring all p53  
268 variants or missense-only (MS) (Figure 6A, COADREAD TCGA data). Importantly, p53LOH  
269 combined with missense mutp53 showed a trend to shorter survival (median 57.2 month vs.  
270 83.2 months in WTp53 patients) (Figure 6B, note that TCGA lacks sufficient numbers of  
271 heterozygous patients (mutp53/+), precluding statistical analysis). Remarkably, HSF1 target  
272 genes are concomitantly upregulated in p53LOH CRCs harboring all p53 mutations (Figure  
273 S6A) or missense-only variants (Figure 6C). Moreover, p53LOH breast cancers (BRCA TCGA)  
274 also exhibited upregulated HSF1 targets (Figures S6B-C). Furthermore, BRCA cells repressed  
275 pSer326-HSF1 when harboring WTp53 but not mutp53 (Figure S6D). In sum, these data  
276 support that in human colorectal and breast cancers p53LOH overrides HSF1 repression by  
277 WTp53 and enables pleiotropic tumor-promoting HSF1 functions contributing to poorer  
278 prognosis.

279

280

281 **In murine CRC organoids p53LOH enables HSF1 activity and triggers mutp53**  
282 **stabilization**

283

284 To further strengthen the WTp53-induced HSF1 repression in heterozygous epithelial cells, we  
285 generated tumor-derived organoids from our murine CRCs (Figure 7A). Importantly, p53<sup>Q/fl</sup>  
286 organoid cultures maintain their heterozygous p53 status over at least 8 passages (Figures  
287 S7A-B). Thus, we treated p53<sup>Q/fl</sup>; vilCreER<sup>T2</sup> tumor-derived organoids first with 4OHT to induce  
288 p53LOH, followed by Nutlin (Figures 7A-B). Heterozygous organoids (EtOH controls) showed  
289 strong induction of p53 target genes after Nutlin, whereas the p53 response was significantly

290 damped in p53LOH organoids (4OHT group) (Figure 7B). Cre recombinase-mediated allele  
291 deletion is never 100% efficient, creating competition between non-recombined and recombined  
292 tumor cells. Indeed, p53 mRNA levels post 4OHT were above those corresponding to a single  
293 (mutant) TP53 copy (Figure S7C), indicating that recombination was below 100%, and  
294 explaining the mild but detectable Nutlin response in 4OHT-treated organoids (Figure 7B).  
295 Importantly, HSF1 target genes were de-repressed in p53LOH organoids (4OHT group) after  
296 Nutlin versus the no-LOH (EtOH) group (Figure 7C), again confirming that p53LOH enables  
297 HSF1 activity.

298

299 In agreement with an upregulated chaperone system after p53LOH, nuclear mutp53<sup>R248Q</sup>  
300 became strongly stabilized after 4OHT (Figures 7D-E). Moreover, while WTP53 strongly  
301 prevents invasion by upregulating e.g. miR34a which controls epithelial-to-mesenchymal  
302 transition (EMT)<sup>66</sup>, miR34a induction is markedly diminished after p53LOH, allowing  
303 upregulation of EMT markers Vimentin and Snail (Figure 7F, compare EtOH+Nutlin vs  
304 4OHT+Nutlin). Combined upregulation of EMT genes and pro-invasive HSF1 target genes like  
305 HspH1<sup>67</sup> and Itgb3bp<sup>39</sup> (Figure 7C) enable invasiveness in a stressed tumor milieu following  
306 p53LOH.

307

308

## 309 DISCUSSION

310 Here we use an autochthonous immune-competent mouse model that recapitulates human  
311 colorectal cancer<sup>68</sup> and identify the mechanism that drives the critical p53LOH event in p53  
312 missense mutant heterozygous tumors. We show that the GOF p53<sup>R248Q</sup> allele fails to exert a  
313 dominant-negative effect over the remaining WTp53 allele. Instead, the activated WT allele  
314 retains its tumor-suppressive function and strongly suppresses the potent HSF1-mediated  
315 stress response necessary for tumor maintenance and progression. We identify a repressive  
316 WTp53-p21-MLK3-MAPK-HSF1 signaling cascade as the underlying mechanism that creates  
317 the driving force for losing the WTp53 allele. The retained WTp53 allele, via its ability to repress  
318 the HSF1-regulated chaperone system, prevents stabilization of mutp53 protein in heterozygous  
319 tumors, thereby blocking the full oncogenic potency of GOF alleles. Hence, WTp53-mediated  
320 HSF1 suppression exerts a strong selection pressure for p53LOH. Conversely, p53LOH, once it  
321 occurs, is a dramatic all-or-none gate-opener, unleashing the broad GOF functions of the  
322 mutant allele by mediating mutp53 stabilization via upregulating the HSF1-HSP90 chaperone  
323 system. This in turn enables tumor invasion<sup>8, 9, 16, 69</sup>. Our findings, corroborated by CRC murine  
324 organoids, human cell lines and human tumors in which mutp53 enables the critical transition  
325 from late adenoma to invasive carcinoma<sup>1, 2</sup>, reveal the pivotal significance of the repressive  
326 WTp53-HSF1 axis. Thus, a single genetic event, p53LOH, kills 3 birds with one stone: *i*) losing  
327 WTp53 suppressor activity including HSF1 repression, *ii*) upregulating tumor-promoting HSF1,  
328 and *iii*) enabling mutp53 protein stabilization, thereby unleashing the GOF potential.

329  
330 Studies of normal tissues of mutp53 knockin mice established that MDM2 degrades mutant and  
331 WTp53 equally well, keeping both mutant and WT levels below immunohistochemical  
332 detection<sup>16, 18, 42</sup>. Conversely, in response to stress both WT and mutp53 proteins stabilize<sup>56, 70,</sup>  
333 <sup>71</sup>. Importantly, we find in our CRC model that the remaining WT allele in heterozygous tumors  
334 is fully activatable, excluding a dominant-negative effect (DNE) by the counterpart mutp53  
335 allele. Although DNE is a likely key driver behind the p53 mutational spectrum in myeloid  
336 malignancies<sup>72</sup>, many missense mutants are highly inefficient in their ability to exert DNE in  
337 epithelial carcinomas and sarcomas, including the hotspot p53<sup>R248Q</sup> allele<sup>9, 31, 56, 73</sup>. We and  
338 others speculate that for DNE to occur in solid tumors, the MUT/WT protein ratio has to greatly  
339 shift in favor of MUT<sup>56, 74</sup>. Yet, while DNE requires acute stress to increase the low-abundance  
340 mutp53 protein and stoichiometrically overwhelm co-expressed WTp53, stress equally stabilizes  
341 WTp53 levels, thus not shifting the ratio. Only a highly active HSF1-chaperone system with its

342 mutp53-selective accumulation can induce the required MUT predominance over WT. However,  
343 the repressive WTp53-HSF1 axis prevents such unilateral mutp53 stabilization, explaining the  
344 strong selection pressure for p53LOH.

345  
346 AOM/DSS CRCs require WTp53 activation by Nutlin (mimicking high proliferative stress or  
347 chemotherapy) to fully regulate HSF1 (Figures 2D, S2G), patient p53LOH tumors intrinsically  
348 exhibit upregulated HSF1 targets compared to WTp53 tumors (Figures 6C, S6A-C). We  
349 speculate that heterozygous human tumors are sufficiently *constitutively* stressed to activate  
350 WTp53 and repress HSF1, and that upon p53LOH human tumors massively upregulate HSF1  
351 activity. In contrast, we posit that baseline AOM/DSS-induced tumors have insufficient stress  
352 levels to drive p53LOH spontaneously, explaining the missing spontaneous p53LOH in the  
353 AOM/DSS model (Figures 1F, S1B), compared to KRAS-driven mouse models of pancreas and  
354 lung cancer<sup>42, 45</sup>. Notably, in human CRCs strong constitutive oncogenic stress from K-RAS/  
355 EGFR/ TGF $\beta$ R/ PDGFR mutations are preeminent<sup>65, 69, 75, 76</sup>, while AOM/DSS tumors undergo  
356 predominantly CTNNB1 but no K-Ras and other proliferative driver mutations<sup>68, 77</sup> which  
357 promote proliferative stress<sup>65</sup>. Thus, baseline murine CRCs might not be stressed enough to  
358 spontaneously activate WTp53 and suppress HSF1 (Figure S2G). This might also explain the  
359 preferred order in which cancer-causing mutations occur during tumorigenesis<sup>76, 78</sup>.

360  
361 Heat shock-induced accumulation and activation of WTp53 also depends on HSF1<sup>40, 79, 80</sup> and  
362 HSF1/chaperone functions<sup>71, 81-84</sup>. Here we identify a hitherto unknown repressive feedback  
363 WTp53-HSF1 counter-regulation. Our data provide an explanation for the longstanding puzzle  
364 why tumor heterozygosity tends to be unstable and why p53LOH strictly correlates with mutp53  
365 stabilization and higher tumor aggressiveness.

366  
367

368

369

370

371

372

373

### **Acknowledgement**

374 We thank Nina Pfisterer and Lukas Gebauer (Molecular Medicine MSc-Program Göttingen) for  
375 technical assistance. R.S.-H. is supported by the DFG (SCHUH3160/3-1), the Heidenreich-von-  
376 Siebold Program (University Medical Center Göttingen) and the KH-Bauer Program (G-CCC  
377 Göttingen). U.M.M. is supported by NIH NCI (2R01CA176647), Deutsche  
378 Forschungsgemeinschaft (MO1998/2-1) and the Stony Brook Foundation TRO program.

379

380

381

## Figure Legends

382

### 383 **Figure 1. p53 loss-of-heterozygosity (p53LOH) is a prerequisite for mutp53 protein** 384 **stabilization and enables invasion in colorectal cancer**

385 (A) p53LOH induction scheme in intestinal epithelial cells. The constitutive GOF TP53<sup>R248Q</sup> allele  
386 (p53<sup>Q</sup>) is paired with the conditional wildtype Trp53 allele (p53<sup>fl</sup>) harboring loxP sites in Introns 2  
387 and 10 for Tamoxifen (TAM)-induced Cre recombinase-mediated deletion. A constitutive WTp53  
388 allele (p53<sup>+</sup>) serves as control. Colorectal tumors were initiated by a bolus of AOM/DSS at age  
389 10 wks. Tumor burden was visualized by weekly colonoscopy (colos). At a defined tumor  
390 burden (when heterozygous mice had at least 2-3 S2 tumors and at least one S3 tumor), TAM  
391 or oil treatment was administered. Oil-treated p53<sup>Q/fl</sup>;viiCreER<sup>T2</sup> and TAM-treated  
392 p53<sup>Q/+</sup>;viiCreER<sup>T2</sup> control mice carry heterozygous tumors, whereas TAM-treated  
393 TP53<sup>R248Q/fl</sup>;viiCreER<sup>T2</sup> (p53<sup>Q/Δ</sup>) mice carry p53LOH tumors. TAM-treated TP53<sup>R248Q/+</sup>;viiCreER<sup>T2</sup>  
394 mice served as additional control to exclude nonspecific TAM effects. Mice were analyzed 2-8  
395 wks after LOH induction.

396 (B) Representative colonoscopy image of an untreated TP53<sup>R248Q/fl</sup>;viiCreER<sup>T2</sup> mouse at 8 wks  
397 post AOM. Tumors with scores S2 (solid arrow) and S3 (dashed arrows)<sup>50</sup>.

398 (C) Representative macroscopic view of the entire dissected colons of p53<sup>Q/fl</sup> mice treated as  
399 indicated, 6 wks after inducing p53LOH. Left end, ileocecal valve; right end anus.

400 (D) Number of colonic tumors per mouse (left) and tumor size distribution (right) of the indicated  
401 genotypes analyzed at 6-8 wks post TAM or oil treatment. Note that both 'no LOH' groups had  
402 the same tumor burden. p53<sup>Q/fl</sup> + oil group with n=6, p53<sup>Q/+</sup> + TAM group with n=5, p53<sup>Q/fl</sup> + TAM  
403 group with n=8. Mean ± SEM, Student's t-test. p\*=0.05; ns, not significant.

404 (E) Number of colonic tumors per mouse (left) and tumor size distribution (right) of the indicated  
405 genotypes analyzed earlier than in (D) at 3-5 wks post TAM. p53<sup>Q/+</sup> + TAM group with n=8,  
406 p53<sup>Q/fl</sup> + TAM group with n=13. Mean ± SEM, Student's t-test. ns, not significant.

407 (F) Representative immunofluorescence of p53 for TAM-treated p53<sup>Q/+</sup> ('no LOH') and TAM-  
408 treated p53<sup>Q/fl</sup> mice ('LOH') at endpoint 6 wks post-TAM. Scale bars, 100 μm.

409 (G) Total number of invasive tumors (left) and numbers of mice with non-invasive and invasive  
410 tumors and (right) of oil-treated p53<sup>Q/fl</sup> mice and TAM-treated p53<sup>Q/+</sup> mice (combined as 'no  
411 LOH' group) versus TAM-treated p53<sup>Q/fl</sup> mice ('LOH' group) analyzed at 6-8 wks post oil/TAM.  
412 (left) 'no LOH', n = 27 tumors from 7 mice analyzed and 'LOH', n = 49 tumors from 8 mice  
413 analyzed. (right) 'no LOH' n = 7 mice and 'LOH' n = 8 mice. Fisher's exact test. Bars, mean ±  
414 SEM. p\*\*\*≤ 0.001.

415 (H) Representative histopathology of two LOH p53<sup>Q/fl</sup> tumors 8 wks after TAM treatment. LOH  
416 induction showing (left) extensive invasion deep within the muscularis propria of the bowel wall  
417 (black arrow) and the muscularis mucosae (white arrows). The deeply invasive malignant gland



418 (black arrow) is ruptured, spilling its content into mucous lakes with single tumor cells floating in  
419 it (#). Right, invading glands in the submucosa (\*). H&E, scale bars 100  $\mu$ m.

420 (I) Representative immunofluorescence of two invasive tumors stabilized for mutp53 from TAM-  
421 treated p53<sup>Q/fl</sup> mice ('LOH' group) for p53 (red),  $\alpha$ -SMA (smooth muscle marker, green) and  
422 DAPI (blue) at endpoint 6 wks. Scale bars, 100  $\mu$ m. MM, muscularis mucosae, MP, muscularis  
423 propia. White arrows, tumor cells invading the MM. Asterix, small invasive cell clumps invading  
424 the submucosa. Note that tips of invading cells are predominantly positive for mutp53.

425

### 426 **Supplemental Figure 1. p53 loss-of-heterozygosity is a prerequisite for mutp53 protein** 427 **stabilization and enables invasion in colorectal cancer**

428 (A) The humanized GOF TP53<sup>R248Q</sup> allele (p53<sup>Q</sup>) was paired with the p53null allele<sup>85</sup> in the  
429 AOM/DSS colorectal cancer model previously described in Schulz-Heddergott et al.<sup>9</sup> to  
430 generate heterozygous p53<sup>Q/+</sup> mice (mimicking no LOH) and GOF p53<sup>Q/-</sup> mice (mimicking  
431 p53LOH), with corresponding controls (p53<sup>-/+</sup> and p53<sup>-/-</sup> mice). All mice were treated with 1.5%  
432 DSS. Time line for p53-proficient (containing one WTp53 allele) and p53-deficient (both p53  
433 alleles are altered) mice used in this study. Endpoint analysis at 10 wks for all mice to avoid  
434 losing p53-deficient mice due to lymphoma and intestinal obstruction.

435 (B) Representative immunofluorescence staining for p53 (green) and DAPI (blue) of CRC  
436 tumors from the indicated genotypes at endpoint 10 wks. Occasional p53<sup>Q/+</sup> tumors show a  
437 minor focus of stabilized mutp53, presumably an area that underwent p53LOH. Scale bars, 100  
438  $\mu$ m. White arrowheads show invasive malignant glands.

439 (C) Total tumor numbers per mouse of the indicated genotypes at endpoints described in (A).  
440 p53<sup>-/+</sup> and p53<sup>Q/+</sup> mice harbor heterozygous CRC tumors. Tumors from p53<sup>-/-</sup> and p53<sup>Q/-</sup> mice  
441 are homozygous for their TP53 alteration mimicking p53LOH. Bars indicate mean  $\pm$  SEM,  
442 Student's t-test. p\*=0.05; p\*\*\*=0.001; ns, not significant.

443 (D) Total number of mice with non-invasive and invasive tumors (left) and total number of  
444 invasive tumors (right) of the indicated genotypes from (A-C) at endpoints described in (A). (left)  
445 p53<sup>-/+</sup> and p53<sup>Q/+</sup>, n = 7 mice each. p53<sup>-/-</sup> and p53<sup>Q/-</sup>, n = 16 mice each. (right) p53<sup>-/+</sup>, n = 42  
446 tumors from 7 mice; p53<sup>Q/+</sup>, n = 45 tumors from 7 mice; p53<sup>-/-</sup>, n = 71 tumors from 16 mice and  
447 p53<sup>Q/-</sup>, n = 115 tumors from 16 mice. Bars, mean  $\pm$  SEM. Fisher's exact test. p\*\*\* $\leq$  0.05, p\*\* $\leq$   
448 0.01.

449 (E) Representative histopathology of p53<sup>Q/-</sup> tumors. H&E staining, Scale bars, 100  $\mu$ m. Dashed  
450 line, muscularis mucosae; dashed/dot line, border to muscularis propia.

451

452

453 **Figure 2. The WTp53 allele in heterozygous colorectal tumors retains its activity and**  
454 **represses HSF1 target gene expression in vivo**

455 (A) Mdm2 mRNA levels of untreated CRC tumors from the indicated genotypes. Single colonic  
456 tumors from the indicated genotypes were pooled ( $\geq 5$  tumors per group). qRT-PCR normalized  
457 to 36B4 mRNA. Mean  $\pm$  SEM of 3 technical replicates, each in triplicates. Student's t-test.

458 (B) Scheme of Nutlin treatment in the AOM/DSS colorectal tumor model. After AOM/DSS  
459 induction, tumor growth was quantitated by serial colonoscopy ('colos'). Mice with the defined  
460 tumor burden of at least 2-3 S2 tumors and at least one S3 tumor were orally treated with  
461 vehicle or 150mg/kg Nutlin for 3 days. Tumors were analyzed 8 hrs after the last treatment.

462 (C, D) mRNA levels of WTp53 target genes (C) or HSF1 target genes (D) of colonic p53<sup>Q/+</sup> and  
463 p53<sup>+/+</sup> tumors of DMSO- and Nutlin-treated mice. Single colonic tumors from the indicated  
464 genotypes were pooled ( $\geq 5$  tumors per group). qRT-PCR normalized to 36B4 mRNA. Mean  $\pm$   
465 SEM of 3 technical replicates, each in triplicates. Student's t-test.

466

467 **Supplemental Figure 2. p53 deletion alone is not sufficient to activate HSF1 *in vivo***

468 (A) Scheme and time line of the AOM/DSS colorectal cancer model using p53null mice<sup>85</sup>. Mice  
469 were treated as indicated. Endpoint analysis at 12 wks for p53-proficient mice to avoid losing  
470 them to extraneous reasons such as intestinal obstruction and anal prolapse. Endpoint analysis  
471 at 10 wks for p53-deficient mice to avoid losing them to lymphoma.

472 (B) Total number of colonic tumors per mouse (left) and tumor size distribution (right) of the  
473 indicated genotypes from (A). n, total mouse numbers. Bars, mean  $\pm$  SEM, Student's t-test.  
474 p\*\*=0.01; ns, not significant.

475 (C) Representative colonoscopy of p53<sup>+/+</sup> and p53<sup>-/-</sup> mice at endpoint 10 wks post AOM/DSS.  
476 White lines outline tumors. Black arrow indicates an S2 tumor and striped arrows indicate S3  
477 tumors. Tumor scoring was performed according to Becker & Neurath<sup>50</sup>.

478 (D) Colon sections from 'Swiss roles' of AOM/DSS-treated p53<sup>+/+</sup> and p53<sup>-/-</sup> mice. H&E.

479 (E-G) mRNA levels of cell cycle genes (E), wildtype p53 target genes (F) and HSF1 target  
480 genes (G) isolated from the indicated genotypes of colonic tumors (pooled samples, n  $\geq 5$   
481 tumors per genotype). qRT-PCR normalized to 36B4 or HPRT mRNA. Mean  $\pm$  SEM of 3  
482 technical replicates, in triplicates. Student's t-test.

483

484

485

486

487 **Figure 3. Activated WTP53 represses HSF1 activity in human colorectal cancer cells**

488 (A) Luciferase reporter assay for heat-shock response elements (HSE). HCT116 and RKO cells  
489 were co-transfected with HSE-*Luc* and *Renilla* plasmids (pRL-TK). 48 hrs later cells were  
490 treated with DMSO or 10  $\mu$ M Nutlin for 24 hrs. *Firefly* expression was normalized to *Renilla*  
491 expression and relative light units (RLU) were calculated. Mean  $\pm$  SEM of 3 independent  
492 experiments, each in triplicates. Student's t test.

493 (B) HSE Luciferase assay as in (A) upon depletion of WTP53 by shRNA. Control, scramble  
494 shRNA. 48 hrs post transfection, cells were treated +/- Nutlin (10  $\mu$ M) for 24 hrs. HSF1 binding  
495 to its HSE-promoter was measured as in (A). Mean  $\pm$  SEM of 3 independent experiments, each  
496 in triplicates. Student's t test.

497 (C) Chaperone-dependent and -independent HSF1 target gene expression in HCT116 and RKO  
498 cells treated with DMSO or 10  $\mu$ M Nutlin for 24 hrs. qRT-PCR for the indicated mRNAs, each  
499 normalized to 36B4 mRNA. Relative values are given in [ratio ( $2^{-\Delta\Delta CT}$ )]. Mean  $\pm$ SEM of 2  
500 independent experiments, each repeated twice in triplicates. Student's t-test,  $p^*=0.05$ ,  $p^{**}=0.01$ ,  
501  $p^{***}=0.001$ ; ns, not significant.

502 (D) HSF1 target gene expression in RKO cells upon depletion of WTP53. 48 hrs post  
503 transfection with two sip53 RNAs or scrambled control siRNA (scr2), RKO cells were treated +/-  
504 Nutlin (10  $\mu$ M) for 24 hrs. qRT-PCR for the indicated mRNAs as in (C). Mean  $\pm$ SEM of 2  
505 independent experiments, each repeated twice in triplicates. Student's t-test,  $p^*=0.05$ ,  $p^{**}=0.01$ ,  
506  $p^{***}=0.001$ .

507 (E) Activated WTP53 suppresses pSer326-HSF1, the key marker of HSF1 activity. HCT116 and  
508 RKO cells were treated +/- Nutlin (10  $\mu$ M) for the indicated times. Immunoblot analysis. p53  
509 accumulation indicates p53 activation. Actin, loading control.

510 (F) Repression of HSF1 target genes (Hsp90 $\alpha$  and Hsp27) and destabilization of the Hsp90 $\alpha$   
511 client proteins AKT, c-Raf and Bcl-xl after p53 activation. HCT116 cells were treated with DMSO  
512 or 10  $\mu$ M Nutlin for the indicated times. Immunoblot analysis. Actin, loading control.

513 (G) Stably HSF1-overexpressing HCT116 subclones (HSF1c1 and HSF1c2) or empty vector  
514 control cells (ORF) were treated with DMSO or Nutlin for 24 hrs. Representative immunoblot  
515 analysis. pSer326-HSF1 shown with short and long exposure times. Actin, loading control.

516 (H) Nutlin represses HSF1 activity in heat-shocked cells, rescued by p53 knockdown. HSE  
517 luciferase assay. HCT116 and RKO cells were transfected with HSE-*Luc* and *Renilla* plasmids  
518 and shp53 as in (B). 48 hrs post transfection, cells were treated with DMSO or 10  $\mu$ M Nutlin for  
519 24 hrs. During the final 2 hrs, HCT116 cells were heat-shocked for 1 hr at 42°C followed by  
520 recovery for 1 hr. HSF1 binding to HSE-*Luc* reporter was measured as in (A). Mean  $\pm$  SEM of 3  
521 independent experiments, each in triplicates. Student's t-test,  $p^*=0.05$ ; ns, not significant.

522 (I) The heat-shock response is markedly attenuated by Nutlin, while p53 depletion rescues  
523 Nutlin-induced HSF1 inactivation. HCT116 cells were transfected with different sip53 RNAs or  
524 scrambled (scr2). 48 hrs post transfection, cells were treated with DMSO or 10  $\mu$ M Nutlin for 24

525 hrs. During the final 2 hrs, HCT116 cells were heat-shocked for 1 hr at 42°C followed by  
526 recovery for 1 hr as in (H). Immunoblot analysis for pSer326-HSF1. Actin, loading control.

527

528 **Supplemental Figure 3. HSF1 activity is repressed by WTp53 in human colorectal cancer**  
529 **cells**

530 (A) p53-induced HSF1 target gene repression is rescued by WTp53 silencing. HCT116 cells  
531 were transfected with siRNAs for p53 or scrambled control siRNA (scr2) for 48 hrs. Cells were  
532 treated with DMSO or 10 μM Nutlin for 24 hrs. qRT-PCRs for the indicated mRNAs, each  
533 normalized to 36B4 mRNA. Relative values are given in [ratio ( $2^{-\Delta\Delta CT}$ )]. Mean ±SEM of 2  
534 independent experiments, each repeated in triplicates. Student's t-test, p\*=0.05, p\*\*=0.01,  
535 p\*\*\*=0.001; ns, not significant.

536 (B) WTp53 harboring LS513 and LS174T cells were treated with DMSO or 10 μM Nutlin for the  
537 indicated times. Representative immunoblot analysis for pSer326-HSF1, the key marker of  
538 HSF1 activity. Actin, loading control.

539 (C) p53 silencing abrogates HSF1 inactivation upon Nutlin. HCT116 cells were transfected with  
540 two different siRNAs against p53 or scrambled control siRNA (scr). 48 hrs post-transfection,  
541 cells were treated with DMSO or 10 μM Nutlin for 24 hrs. Cell lysates were immunoblotted for  
542 pSer326-HSF1, total HSF1 (tHSF1) and p53. Actin, loading control.

543 (D) p53 deletion prevents Nutlin-induced HSF1 inactivation. Isogenic HCT116 cells (p53<sup>+/+</sup> vs  
544 p53<sup>-/-</sup>, harboring a p53 Exon2 deletion) were left untreated (un) or treated with DMSO or Nutlin  
545 for 24 hrs. Representative immunoblots for pSer326-HSF1 and p53. Actin, loading control.

546 (E) mutp53-containing CRC cells failed to reduce pSer326-HSF1 after Nutlin. SW480 cells  
547 treated +/- Nutlin (20 μM) for the indicated hours. Representative immunoblot. Actin, loading  
548 control.

549 (F) Stably HSF1-overexpressing HCT116 subclone HSF1c1 and its empty vector control line  
550 (ORF) were treated with DMSO or 10 μM Nutlin for 24 hrs. qRT-PCR analysis of the indicated  
551 HSF1 target genes. Mean ±SEM of 2 independent experiments, each repeated twice in  
552 triplicates. Student's t-test, p\*=0.05, p\*\*=0.01; ns.

553

554

555 **Figure 4. p53 suppresses HSF1 activity via cyclin-dependent kinase inhibitor**  
556 **CDKN1A/p21 in human CRC cells**

557 (A) p21 silencing attenuates p53-induced HSF1 inactivation. RKO cells were transfected with  
558 different siRNAs against p21 and p53 or scrambled control siRNA (scr2) for 48 hrs. Cells were  
559 then treated with DMSO or 10  $\mu$ M Nutlin for 24 hrs. Representative Immunoblot analysis for  
560 pSer326-HSF1, p21 and p53. Actin, loading control.

561 (B) Rescue of p53-induced HSF1 target gene suppression by depletion of p21 in RKO cells. 48  
562 hrs post transfection with siRNAs against p21 or scrambled control siRNA (scr2), cells were  
563 treated with DMSO or 10  $\mu$ M Nutlin for 24 hrs. qRT-PCR of the indicated mRNAs, normalized to  
564 36B4 mRNA. Relative values given in [ratio ( $2^{-ddCT}$ )]. Mean  $\pm$ SEM of 2 independent experiments,  
565 each repeated twice in triplicates. Student's t-test,  $p^*=0.05$ ; ns, not significant.

566 (C) WTp53 harboring CRC cell lines were treated with DMSO, 10  $\mu$ M Palbociclib (Palbo) or 10  
567  $\mu$ M Nutlin for 24 hrs. Cell cycle inhibition was confirmed by Rb de(hypo)phosphorylation.  
568 Immunoblot analysis for the indicated proteins. pRb, phospho-Rb. Actin, loading control.

569 (D) HSF1 target gene repression after direct cell cycle inhibition. RKO cells were treated with 10  
570  $\mu$ M Palbociclib (CDK4/6 inhibitor), 10  $\mu$ M Nutlin (MDM2 inhibitor) or DMSO for 24 hrs. qRT-  
571 PCRs analysis for the indicated mRNAs. Relative values calculated as in (B). Mean  $\pm$ SEM of 2  
572 independent experiments, each repeated twice in triplicates. Student's t-test,  $p^*=0.05$ ,  $p^{**}=0.01$ ,  
573  $p^{***}=0.001$ ; ns, not significant.

574 (E, F) Cell cycle inhibition by p53 inactivates HSF1 activity. HCT116 cells were treated with  
575 DMSO, 10  $\mu$ M Nutlin, 10  $\mu$ M Palbociclib, RG7112 (E) or RG7388/Idasanutlin (F) as indicated for  
576 24 hrs. Immunoblot analysis. Actin, loading control.

577 (G) Cell cycle inhibition prevents pSer326-HSF1 activation in stably HSF1-overexpressing  
578 HCT116 cells. HSF1c1 or empty vector control (ORF) cells were treated with DMSO, H<sub>2</sub>O, 10  
579  $\mu$ M Nutlin or 10  $\mu$ M Palbociclib for 24 hrs. Representative immunoblot analysis. Actin, loading  
580 control.

581 (H) Cell cycle inhibition in HSF1-overexpressing HSF1c1 cells strongly repress HSF1 target  
582 gene expression. HSF1c1 or ORF control cells were exposed to H<sub>2</sub>O or Palbociclib (10  $\mu$ M) for  
583 24 hrs. qRT-PCR analysis of the indicated HSF1 target genes. Mean  $\pm$ SEM of 2 independent  
584 experiments, each repeated twice in triplicates. Student's t-test,  $p^*=0.05$ ,  $p^{**}=0.01$ ,  $p^{***}=0.001$ ;  
585 ns, not significant.

586 (I) Direct CDK4/6 inhibition drives HSF1 inactivation. HCT116 cells were treated with DMSO, 10  
587  $\mu$ M Nutlin, 10  $\mu$ M Palbociclib, 0.5  $\mu$ M and 10  $\mu$ M RO3306 and 20  $\mu$ M Roscovitine (Rosco) for 24  
588 hrs. Representative immunoblot. Actin, loading control.

589

590

591 **Supplemental Figure 4. p53 suppresses HSF1 activity via cyclin-dependent kinase**  
592 **inhibitor CDKN1A/p21 in human CRC cells**

593 (A) Analysis of *CDKN1A*/p21 mRNA expression. One representative qRT-PCR each shown for  
594 HCT116 and RKO cells. Cells were transfected with siRNAs against *CDKN1A*/p21 and p53 or  
595 scrambled control siRNA (scr2) for 48 hrs, followed by DMSO or 10  $\mu$ M Nutlin treatment for 24  
596 hrs. Relative values of *CDKN1A* mRNA normalized to 36B4 mRNA and given in [ratio ( $2^{-\Delta\Delta CT}$ )].

597 (B) Analysis of HSF1 target gene expression in HCT116 cells upon depletion of p21. 48 hrs post  
598 transfection with two siRNAs against p21 or scrambled control siRNA (scr2), HCT116 cells were  
599 treated with DMSO or 10  $\mu$ M Nutlin for 24 hrs. qRT-PCR analysis. Mean  $\pm$ SEM of 2  
600 independent experiments, each repeated twice in triplicates. Relative values were calculated as  
601 in (A). Student's t-test,  $p^*=0.05$ ,  $p^{**}=0.01$ ,  $p^{***}=0.001$ ; ns, not significant.

602



603 **Figure 5. Wtp53 activation represses MLK3. MLK3 links cell cycle to the MAPK stress**  
604 **pathway to activate the HSF1 response**

605 (A) Expression of cell cycle progression genes is inhibited by p53 activation. HCT116 cells were  
606 transfected with siRNAs for p53 or scrambled control siRNA (scr2) for 48 hrs, followed by  
607 DMSO or 10  $\mu$ M Nutlin treatment for 24 hrs. qRT-PCRs for the indicated mRNAs, each  
608 normalized to 36B4 mRNA. MLK3, Mixed lineage kinase 3. PLK4, polo-like kinase 4. Relative  
609 values as ratio ( $2^{-\text{ddCT}}$ ). Mean  $\pm$ SEM of 2 independent experiments, each repeated in triplicates.  
610 Student's t-test,  $p^*=0.05$ ,  $p^{**}=0.01$ ,  $p^{***}=0.001$ .

611 (B) MLK3 silencing suppresses pSer326-HSF1, mimicking that seen by p53 activation. Indicated  
612 cells were transfected with an siRNAs pool against MLK3 or scrambled control siRNA (scr2). 48  
613 hrs post-transfection, cells were treated with DMSO or 10  $\mu$ M Nutlin for 24 hrs. Immunoblot  
614 analysis. GAPDH, loading control.

615 (C) MLK3 silencing abrogates HSF1 target gene expression, mimicking that seen by p53  
616 activation. HCT116 cells were transfected and treated as in (B). qRT-PCRs for the indicated  
617 mRNAs, each normalized to 36B4 mRNA. Relative values were calculated as in (A). Mean  
618  $\pm$ SEM of 2 independent experiments, each repeated in triplicates. Student's t-test,  $p^*=0.05$ ,  
619  $p^{**}=0.01$ ,  $p^{***}=0.001$ .

620 (D) HSF1 target gene expression is attenuated after MLK3 depletion. Indicated cells were  
621 transfected with an siRNAs pool against MLK3 or scrambled control siRNA (scr2). 72 hrs post-  
622 transfection, qRT-PCRs for the indicated mRNAs was performed. Normalized to 36B4 mRNA.  
623 Relative values and means as in (A). Mean  $\pm$ SEM of 2 independent experiments, each repeated  
624 in triplicates. Student's t-test,  $p^*=0.05$ ,  $p^{**}=0.01$ ,  $p^{***}=0.001$ .

625 (E-G) Cell cycle inhibition reduces MLK3 expression and causes MEK1 inactivation. The  
626 indicated cells were treated for 24 hrs with DMSO, 10  $\mu$ M Nutlin or 10  $\mu$ M Palbociclib (CDK4i)  
627 (E, G), RG7112 (F) and RO3306 (G) at the indicated concentrations. Immunoblot analysis.  
628 GAPDH, loading control.

629

630 **Supplemental Figure 5. Cell cycle aberrations activate the MEK pathway and regulate**  
631 **HSF1 activity**

632 (A, B) Depletion of CDK1 (A) and CDK2 (B) fail to abrogate HSF1 activity. The indicated cells  
633 were transfected with two different siRNAs each. 72 hrs post-transfection, cell lysates were  
634 analyzed by immunoblots. Actin, loading control.

635 (C) PLK4 silencing in RKO cells from (D). Cells were transfected with 2 different siRNAs against  
636 PLK4 or scrambled control siRNA (scr) for 72 hrs. qRT-PCRs for PLK4 mRNAs normalized to  
637 36B4 mRNA. Relative values, ratio ( $2^{-\text{ddCT}}$ ). Mean  $\pm$ SEM of 2 independent experiments, each  
638 repeated in triplicates. Student's t-test,  $p^*=0.05$ ,  $p^{**}=0.01$ ,  $p^{***}=0.001$ .



639 (D) Despite PLK4 mRNA silencing (C), PLK4 protein and pSer326-HSF1 levels are stable,  
640 excluding PLK4 as HSF1-activating kinase. Immunoblot analysis of RKO cells from (C).

641 (E) Activated WTp53 strongly reduces MLK3 protein levels. The indicated CRC cells were  
642 treated with DMSO or 10  $\mu$ M Nutlin for 36 hrs. Immunoblot analysis. Actin, loading control.

643

644

645 **Figure 6. p53LOH combined with p53 missense mutations shortens patient survival and**  
646 **upregulates HSF1 activity in human colorectal cancer**

647 (A) Proportion of human colorectal adenocarcinoma samples with p53LOH versus no-p53LOH.  
648 Analysis of the latest version of the COADREAD TCGA dataset, grouped for all types of TP53  
649 mutations (MS, missense; FS, frameshift; NS, nonsense) versus TP53 missense mutations-only  
650 (MS). p53LOH samples (= shallow deletion) were determined by TP53 copy number alterations.  
651 MS/FS/NS column, p53LOH samples in red of n=222 patients, and no-p53LOH in blue of n=57  
652 patients. MS column, p53LOH samples in red with n=168 patients, and no-p53LOH in blue with  
653 n=43.

654 (B) Kaplan-Meier survival curve of all available patients from COADREAD TCGA database.  
655 Colorectal cancer patients harboring homozygous WT TP53 were compared to patients  
656 harboring missense (MS) p53 mutations plus p53LOH (= shallow deletions). The mean survival  
657 of WTp53 patients (n=214) is 83.2 month versus 57.2 months for patients with MS plus p53LOH  
658 (mutp53/-) (n=166). Kaplan-Meier statistic on patient cohorts from TCGA, log-rank test, p=0.19.  
659 Note that TCGA data contains insufficient numbers of heterozygous patients (mutp53/+),  
660 precluding statistical analysis.

661 (C) Heatmap of HSF1 target genes analyzed from colorectal adenocarcinoma patients  
662 (COADREAD cohort TCGA database). Patients harboring homozygous TP53<sup>+/+</sup> (WT TP53)  
663 were compared to patients harboring TP53 missense (MS) mutations plus p53LOH (= shallow  
664 deletions) (TP53<sup>MS + LOH</sup>). Patient numbers are indicated. Genes were ordered from top to  
665 bottom by their relative upregulation (red) and downregulation (blue) and their p-value  
666 significance in t-tests. The HSF1 target gene panel from Mendillo et al was used<sup>39</sup>. Note, HSF1  
667 negatively regulates a subset of target genes.

668

669 **Supplemental Figure 6. p53LOH combined with p53 missense mutations upregulates**  
670 **HSF1 activity in colorectal and breast cancer patients**

671 (A) Heatmap of HSF1 target genes analyzed from colorectal adenocarcinoma patients  
672 (COADREAD cohort TCGA database). Patients harboring homozygous TP53<sup>+/+</sup> (WT TP53)  
673 were compared to patients harboring TP53 alterations (MS, missense; FS, frameshift; NS,  
674 nonsense) plus p53LOH (= shallow deletions) (TP53<sup>MS/FS/NS + LOH</sup>). Patient numbers are  
675 indicated. (A-C) Genes were ordered from top to bottom by their relative upregulation (red) and  
676 downregulation (blue) and their p-value significance in t-tests. The HSF1 target gene panel from  
677 Mendillo et al was used<sup>39</sup>. Note, HSF1 negatively regulates a subset of target genes.

678 (B, C) Heatmap of HSF1 target genes analyzed from breast cancer patients (BRCA cohort  
679 TCGA database). Patients harboring homozygous TP53<sup>+/+</sup> (WT TP53) were compared to  
680 patients harboring all TP53 alterations (MS, missense; FS, frameshift; NS, nonsense) plus  
681 p53LOH (= shallow deletions) (TP53<sup>MS/FS/NS + LOH</sup>) in (B), and also compared to patients  
682 harboring TP53 missense (MS) mutations-only plus p53LOH (= shallow deletions) (TP53<sup>MS + LOH</sup>)  
683 in (C). Patient numbers are indicated.

684 (D) The MCF7 breast cancer cell line harboring homozygous WTp53 and the MDA-MB-231  
685 breast cancer cell line harboring homozygous mutp53 R280K missense mutation were treated  
686 with DMSO, Nutlin or Idasanutlin (RG7388) for 24 hrs as indicated. Representative immunoblot  
687 analysis. Actin, loading control.

688

689

690 **Figure 7. In murine CRC organoids p53LOH enables HSF1 activity and triggers mutp53**  
691 **stabilization**

692 (A) Scheme for treatment of colonic tumor-derived organoids. Heterozygous p53<sup>Q/fl</sup>; vilCreER<sup>T2</sup>  
693 mice were treated with AOM/DSS and tumor burden was visualized via colonoscopy. Tumors  
694 arisen between 6-8 wks post AOM were resected and processed for colonic organoid cultures.  
695 p53LOH was induced by adding 4OHT (4OH-Tamoxifen) for 24 hrs to activate the CreER<sup>T2</sup>  
696 recombinase and create p53<sup>Q/Δ</sup> organoids. EtOH, control treatment (no-LOH, p53<sup>Q/fl</sup>). Two days  
697 after p53LOH induction, organoids were treated with 10 μM Nutlin or DMSO for 24 hrs and  
698 harvested for analysis.

699 (B, C) mRNA levels of p53 target genes (B) and HSF1 target genes (C) isolated from colonic  
700 p53<sup>Q/fl</sup> organoids treated as indicated. qRT-PCR normalized to HPRT mRNA. Mean ± SEM of 3  
701 different organoid cultures (generated from 3 different mice) each measured in triplicates.  
702 Student's t-test, p\*=0.05, p\*\*=0.01, p\*\*\*=0.001; ns, not significant.

703 (D) Quantification of (E) using a score for colonic organoids exhibiting nuclear p53 staining.  
704 Each dot indicates one organoid of the indicated treatment groups. Nuclear p53 staining score:  
705 0 = no positive nucleus per organoid; 1 = 1 – 20% positive nuclei per organoid; 2 = 20 – 50%  
706 positive nuclei per organoid and 3 > 50 % positive nuclei per organoid.

707 (E) Representative immunofluorescence staining of the indicated p53<sup>Q/fl</sup> organoid groups for p53  
708 (red), E-cadherin (Ecad, green) and DAPI (blue). Scale bars, 100 μm.

709 (F) mRNA levels of pre-miR34a, Vim and Snai1 of colonic p53<sup>Q/fl</sup> organoids treated as indicated.  
710 qRT-PCR normalized to HPRT mRNA. Mean ± SEM of 3 different organoid cultures (generated  
711 from 3 different mice) each measured in triplicates. Student's t-test, p\*\*=0.01, p\*\*\*=0.001; ns,  
712 not significant.

713

714 **Supplemental Figure 7. Analysis of heterozygous CRC organoids**

715 (A) Scheme for treatment of colonic tumor-derived organoids. Heterozygous p53<sup>Q/fl</sup>; vilCreER<sup>T2</sup>  
716 mice were treated with AOM/DSS and tumor burden was visualized via colonoscopy. Tumors  
717 arisen between 6-8 wks post AOM were resected and processed for colonic organoid cultures.  
718 p53LOH was induced by adding 4OHT (4OH-Tamoxifen) for 24 hrs to activate the CreER<sup>T2</sup>  
719 recombinase and create p53<sup>Q/Δ</sup> organoids. EtOH, control treatment (no-LOH, p53<sup>Q/fl</sup>). Two days  
720 after p53LOH induction, organoids were treated with 10 μM Nutlin or DMSO for 24 hrs and  
721 harvested for analysis.

722 (B) The heterozygous p53 genotype in CRC organoids is stable. Two randomly chosen  
723 organoid cultures (generated from 2 different heterozygous TP53<sup>R248Q/fl</sup>; vilCreER<sup>T2</sup> mice) were  
724 followed during p2-p7 passaging in vitro. The p53 floxed allele and the p53<sup>Q</sup> allele are  
725 indicated.

726 (C) Incomplete recombination. *Trp53* mRNA levels isolated from colonic organoids after  
727 p53LOH induction by 4OHT treatment. qRT-PCR normalized to HPRT mRNA. Mean  $\pm$  SEM of 3  
728 different organoid cultures generated from 3 different mice each measured in triplicates. The  
729 dotted line indicates the value corresponding to 1 copy of the TP53 gene.

730

731

## References

- 732 1. Fearon, E.R. & Vogelstein, B. A genetic model for colorectal tumorigenesis. *Cell* **61**, 759-767  
733 (1990).
- 734 2. Levine, A.J. & Oren, M. The first 30 years of p53: growing ever more complex. *Nat Rev Cancer* **9**,  
735 749-758 (2009).
- 736 3. Walerych, D., Lisek, K. & Del Sal, G. Mutant p53: One, No One, and One Hundred Thousand.  
737 *Front Oncol* **5**, 289 (2015).
- 738 4. Brosh, R. & Rotter, V. When mutants gain new powers: news from the mutant p53 field. *Nat Rev*  
739 *Cancer* **9**, 701-713 (2009).
- 740 5. Bykov, V.J.N., Eriksson, S.E., Bianchi, J. & Wiman, K.G. Targeting mutant p53 for efficient cancer  
741 therapy. *Nat Rev Cancer* **18**, 89-102 (2018).
- 742 6. Nakayama, M. & Oshima, M. Mutant p53 in colon cancer. *J Mol Cell Biol* **11**, 267-276 (2019).
- 743 7. Schwitalla, S. *et al.* Loss of p53 in enterocytes generates an inflammatory microenvironment  
744 enabling invasion and lymph node metastasis of carcinogen-induced colorectal tumors. *Cancer*  
745 *Cell* **23**, 93-106 (2013).
- 746 8. Cooks, T. *et al.* Mutant p53 prolongs NF-kappaB activation and promotes chronic inflammation  
747 and inflammation-associated colorectal cancer. *Cancer Cell* **23**, 634-646 (2013).
- 748 9. Schulz-Heddergott, R. *et al.* Therapeutic Ablation of Gain-of-Function Mutant p53 in Colorectal  
749 Cancer Inhibits Stat3-Mediated Tumor Growth and Invasion. *Cancer Cell* **34**, 298-314 e297  
750 (2018).
- 751 10. Cancer Genome Atlas, N. Comprehensive molecular characterization of human colon and rectal  
752 cancer. *Nature* **487**, 330-337 (2012).
- 753 11. Goldstein, I. *et al.* Understanding wild-type and mutant p53 activities in human cancer: new  
754 landmarks on the way to targeted therapies. *Cancer Gene Ther* **18**, 2-11 (2011).
- 755 12. Joerger, A.C. & Fersht, A.R. Structural biology of the tumor suppressor p53. *Annu Rev Biochem*  
756 **77**, 557-582 (2008).
- 757 13. Olivier, M., Hollstein, M. & Hainaut, P. TP53 mutations in human cancers: origins, consequences,  
758 and clinical use. *Cold Spring Harb Perspect Biol* **2**, a001008 (2010).
- 759 14. Schulz-Heddergott, R. & Moll, U.M. Gain-of-Function (GOF) Mutant p53 as Actionable  
760 Therapeutic Target. *Cancers (Basel)* **10** (2018).
- 761 15. Olive, K.P. *et al.* Mutant p53 gain of function in two mouse models of Li-Fraumeni syndrome.  
762 *Cell* **119**, 847-860 (2004).
- 763 16. Terzian, T. *et al.* The inherent instability of mutant p53 is alleviated by Mdm2 or p16INK4a loss.  
764 *Genes Dev* **22**, 1337-1344 (2008).
- 765 17. Hanel, W. *et al.* Two hot spot mutant p53 mouse models display differential gain of function in  
766 tumorigenesis. *Cell Death Differ* **20**, 898-909 (2013).
- 767 18. Lang, G.A. *et al.* Gain of function of a p53 hot spot mutation in a mouse model of Li-Fraumeni  
768 syndrome. *Cell* **119**, 861-872 (2004).
- 769 19. Nakayama, M. *et al.* Intestinal cancer progression by mutant p53 through the acquisition of  
770 invasiveness associated with complex glandular formation. *Oncogene* **36**, 5885-5896 (2017).
- 771 20. Stein, Y., Rotter, V. & Aloni-Grinstein, R. Gain-of-Function Mutant p53: All the Roads Lead to  
772 Tumorigenesis. *Int J Mol Sci* **20** (2019).
- 773 21. Freed-Pastor, W.A. & Prives, C. Mutant p53: one name, many proteins. *Genes Dev* **26**, 1268-  
774 1286 (2012).
- 775 22. Kim, M.P. & Lozano, G. Mutant p53 partners in crime. *Cell Death Differ* **25**, 161-168 (2018).
- 776 23. Bellazzo, A., Sicari, D., Valentino, E., Del Sal, G. & Collavin, L. Complexes formed by mutant p53  
777 and their roles in breast cancer. *Breast Cancer (Dove Med Press)* **10**, 101-112 (2018).

- 778 24. Muller, P.A.J. & Vousden, K.H. Mutant p53 in Cancer: New Functions and Therapeutic  
779 Opportunities. *Cancer Cell* **25**, 304-317 (2014).
- 780 25. Pfister, N.T. & Prives, C. Transcriptional Regulation by Wild-Type and Cancer-Related Mutant  
781 Forms of p53. *Cold Spring Harb Perspect Med* **7** (2017).
- 782 26. Zhang, Y. *et al.* Somatic Trp53 mutations differentially drive breast cancer and evolution of  
783 metastases. *Nat Commun* **9**, 3953 (2018).
- 784 27. Blagosklonny, M.V., Toretsky, J., Bohlen, S. & Neckers, L. Mutant conformation of p53 translated  
785 in vitro or in vivo requires functional HSP90. *Proc Natl Acad Sci U S A* **93**, 8379-8383 (1996).
- 786 28. Whitesell, L., Sutphin, P.D., Pulcini, E.J., Martinez, J.D. & Cook, P.H. The physical association of  
787 multiple molecular chaperone proteins with mutant p53 is altered by geldanamycin, an hsp90-  
788 binding agent. *Mol Cell Biol* **18**, 1517-1524 (1998).
- 789 29. Muller, P., Hrstka, R., Coomber, D., Lane, D.P. & Vojtesek, B. Chaperone-dependent stabilization  
790 and degradation of p53 mutants. *Oncogene* **27**, 3371-3383 (2008).
- 791 30. Ingallina, E. *et al.* Mechanical cues control mutant p53 stability through a mevalonate-RhoA axis.  
792 *Nat Cell Biol* **20**, 28-35 (2018).
- 793 31. Lee, M.K. *et al.* Cell-type, dose, and mutation-type specificity dictate mutant p53 functions in  
794 vivo. *Cancer Cell* **22**, 751-764 (2012).
- 795 32. Li, D., Marchenko, N.D. & Moll, U.M. SAHA shows preferential cytotoxicity in mutant p53 cancer  
796 cells by destabilizing mutant p53 through inhibition of the HDAC6-Hsp90 chaperone axis. *Cell*  
797 *Death Differ* **18**, 1904-1913 (2011).
- 798 33. Li, D. *et al.* Functional inactivation of endogenous MDM2 and CHIP by HSP90 causes aberrant  
799 stabilization of mutant p53 in human cancer cells. *Mol Cancer Res* **9**, 577-588 (2011).
- 800 34. Anckar, J. & Sistonen, L. Regulation of HSF1 function in the heat stress response: implications in  
801 aging and disease. *Annu Rev Biochem* **80**, 1089-1115 (2011).
- 802 35. Gomez-Pastor, R., Burchfiel, E.T. & Thiele, D.J. Regulation of heat shock transcription factors and  
803 their roles in physiology and disease. *Nat Rev Mol Cell Biol* **19**, 4-19 (2018).
- 804 36. Whitesell, L. & Lindquist, S. Inhibiting the transcription factor HSF1 as an anticancer strategy.  
805 *Expert Opin Ther Targets* **13**, 469-478 (2009).
- 806 37. Dai, C., Whitesell, L., Rogers, A.B. & Lindquist, S. Heat shock factor 1 is a powerful multifaceted  
807 modifier of carcinogenesis. *Cell* **130**, 1005-1018 (2007).
- 808 38. Miyata, Y., Nakamoto, H. & Neckers, L. The therapeutic target Hsp90 and cancer hallmarks. *Curr*  
809 *Pharm Des* **19**, 347-365 (2013).
- 810 39. Mendillo, M.L. *et al.* HSF1 drives a transcriptional program distinct from heat shock to support  
811 highly malignant human cancers. *Cell* **150**, 549-562 (2012).
- 812 40. Toma-Jonik, A., Vydra, N., Janus, P. & Widlak, W. Interplay between HSF1 and p53 signaling  
813 pathways in cancer initiation and progression: non-oncogene and oncogene addiction. *Cell*  
814 *Oncol (Dordr)* **42**, 579-589 (2019).
- 815 41. Alexandrova, E.M. *et al.* p53 loss-of-heterozygosity is a necessary prerequisite for mutant p53  
816 stabilization and gain-of-function in vivo. *Cell Death Dis* **8**, e2661 (2017).
- 817 42. Hingorani, S.R. *et al.* Trp53R172H and KrasG12D cooperate to promote chromosomal instability  
818 and widely metastatic pancreatic ductal adenocarcinoma in mice. *Cancer Cell* **7**, 469-483 (2005).
- 819 43. Baker, S.J. *et al.* Chromosome 17 deletions and p53 gene mutations in colorectal carcinomas.  
820 *Science* **244**, 217-221 (1989).
- 821 44. Parikh, N. *et al.* Effects of TP53 mutational status on gene expression patterns across 10 human  
822 cancer types. *J Pathol* **232**, 522-533 (2014).
- 823 45. Jackson, E.L. *et al.* The differential effects of mutant p53 alleles on advanced murine lung cancer.  
824 *Cancer Res* **65**, 10280-10288 (2005).



- 825 46. Donehower, L.A. *et al.* Integrated Analysis of TP53 Gene and Pathway Alterations in The Cancer  
826 Genome Atlas. *Cell Rep* **28**, 1370-1384 e1375 (2019).
- 827 47. Donehower, L.A. *et al.* Integrated Analysis of TP53 Gene and Pathway Alterations in The Cancer  
828 Genome Atlas. *Cell Rep* **28**, 3010 (2019).
- 829 48. Muzumdar, M.D. *et al.* Clonal dynamics following p53 loss of heterozygosity in Kras-driven  
830 cancers. *Nat Commun* **7**, 12685 (2016).
- 831 49. Shetzer, Y. *et al.* The onset of p53 loss of heterozygosity is differentially induced in various stem  
832 cell types and may involve the loss of either allele. *Cell Death Differ* **21**, 1419-1431 (2014).
- 833 50. Becker, C., Fantini, M.C. & Neurath, M.F. High resolution colonoscopy in live mice. *Nat Protoc* **1**,  
834 2900-2904 (2006).
- 835 51. Ghaleb, A., Yallowitz, A. & Marchenko, N. Irradiation induces p53 loss of heterozygosity in breast  
836 cancer expressing mutant p53. *Commun Biol* **2**, 436 (2019).
- 837 52. Li, D., Yallowitz, A., Ozog, L. & Marchenko, N. A gain-of-function mutant p53-HSF1 feed forward  
838 circuit governs adaptation of cancer cells to proteotoxic stress. *Cell Death Dis* **5**, e1194 (2014).
- 839 53. Esser, C., Scheffner, M. & Hohfeld, J. The chaperone-associated ubiquitin ligase CHIP is able to  
840 target p53 for proteasomal degradation. *J Biol Chem* **280**, 27443-27448 (2005).
- 841 54. Iyer, S.V. *et al.* Allele-specific silencing of mutant p53 attenuates dominant-negative and gain-of-  
842 function activities. *Oncotarget* **7**, 5401-5415 (2016).
- 843 55. Kern, S.E. *et al.* Oncogenic forms of p53 inhibit p53-regulated gene expression. *Science* **256**, 827-  
844 830 (1992).
- 845 56. Sabapathy, K. The Contrived Mutant p53 Oncogene - Beyond Loss of Functions. *Front Oncol* **5**,  
846 276 (2015).
- 847 57. Shahbandi, A. & Jackson, J.G. Analysis across multiple tumor types provides no evidence that  
848 mutant p53 exerts dominant negative activity. *NPJ Precis Oncol* **3**, 1 (2019).
- 849 58. Schulz, R. *et al.* HER2/ErbB2 activates HSF1 and thereby controls HSP90 clients including MIF in  
850 HER2-overexpressing breast cancer. *Cell Death Dis* **5**, e980 (2014).
- 851 59. Polager, S. & Ginsberg, D. E2F - at the crossroads of life and death. *Trends Cell Biol* **18**, 528-535  
852 (2008).
- 853 60. Rattanasinchai, C. & Gallo, K.A. MLK3 Signaling in Cancer Invasion. *Cancers (Basel)* **8** (2016).
- 854 61. Hartkamp, J., Troppmair, J. & Rapp, U.R. The JNK/SAPK activator mixed lineage kinase 3 (MLK3)  
855 transforms NIH 3T3 cells in a MEK-dependent fashion. *Cancer Res* **59**, 2195-2202 (1999).
- 856 62. Schroyer, A.L., Stimes, N.W., Abi Saab, W.F. & Chadee, D.N. MLK3 phosphorylation by ERK1/2 is  
857 required for oxidative stress-induced invasion of colorectal cancer cells. *Oncogene* **37**, 1031-  
858 1040 (2018).
- 859 63. Tang, Z. *et al.* MEK guards proteome stability and inhibits tumor-suppressive amyloidogenesis  
860 via HSF1. *Cell* **160**, 729-744 (2015).
- 861 64. Vydra, N. *et al.* 17beta-Estradiol Activates HSF1 via MAPK Signaling in ERalpha-Positive Breast  
862 Cancer Cells. *Cancers (Basel)* **11** (2019).
- 863 65. Hanahan, D. & Weinberg, R.A. Hallmarks of cancer: the next generation. *Cell* **144**, 646-674  
864 (2011).
- 865 66. Rokavec, M., Li, H., Jiang, L. & Hermeking, H. The p53/miR-34 axis in development and disease. *J*  
866 *Mol Cell Biol* **6**, 214-230 (2014).
- 867 67. Kimura, A. *et al.* Nuclear heat shock protein 110 expression is associated with poor prognosis  
868 and chemotherapy resistance in gastric cancer. *Oncotarget* **7**, 18415-18423 (2016).
- 869 68. Tanaka, T. Development of an inflammation-associated colorectal cancer model and its  
870 application for research on carcinogenesis and chemoprevention. *Int J Inflamm* **2012**, 658786  
871 (2012).

- 872 69. Muller, P.A. *et al.* Mutant p53 drives invasion by promoting integrin recycling. *Cell* **139**, 1327-  
873 1341 (2009).
- 874 70. Wawrzynow, B., Zylicz, A. & Zylicz, M. Chaperoning the guardian of the genome. The two-faced  
875 role of molecular chaperones in p53 tumor suppressor action. *Biochim Biophys Acta* **1869**, 161-  
876 174 (2018).
- 877 71. King, F.W., Wawrzynow, A., Hohfeld, J. & Zylicz, M. Co-chaperones Bag-1, Hop and Hsp40  
878 regulate Hsc70 and Hsp90 interactions with wild-type or mutant p53. *EMBO J* **20**, 6297-6305  
879 (2001).
- 880 72. Boettcher, S. *et al.* A dominant-negative effect drives selection of TP53 missense mutations in  
881 myeloid malignancies. *Science* **365**, 599-604 (2019).
- 882 73. Lane, D.P. How to lose tumor suppression. *Science* **365**, 539-540 (2019).
- 883 74. Sabapathy, K. & Lane, D.P. Therapeutic targeting of p53: all mutants are equal, but some  
884 mutants are more equal than others. *Nat Rev Clin Oncol* **15**, 13-30 (2018).
- 885 75. Weissmueller, S. *et al.* Mutant p53 drives pancreatic cancer metastasis through cell-autonomous  
886 PDGF receptor beta signaling. *Cell* **157**, 382-394 (2014).
- 887 76. Sakai, E. *et al.* Combined Mutation of Apc, Kras, and Tgfbr2 Effectively Drives Metastasis of  
888 Intestinal Cancer. *Cancer Res* **78**, 1334-1346 (2018).
- 889 77. Bolt, A.B., Papanikolaou, A., Delker, D.A., Wang, Q.S. & Rosenberg, D.W. Azoxymethane induces  
890 K1-ras activation in the tumor resistant AKR/J mouse colon. *Mol Carcinog* **27**, 210-218 (2000).
- 891 78. Takeda, H. *et al.* Transposon mutagenesis identifies genes and evolutionary forces driving  
892 gastrointestinal tract tumor progression. *Nat Genet* **47**, 142-150 (2015).
- 893 79. Logan, I.R. *et al.* Heat shock factor-1 modulates p53 activity in the transcriptional response to  
894 DNA damage. *Nucleic Acids Res* **37**, 2962-2973 (2009).
- 895 80. Nitta, M., Okamura, H., Aizawa, S. & Yamaizumi, M. Heat shock induces transient p53-  
896 dependent cell cycle arrest at G1/S. *Oncogene* **15**, 561-568 (1997).
- 897 81. Jin, X., Moskophidis, D., Hu, Y., Phillips, A. & Mivechi, N.F. Heat shock factor 1 deficiency via its  
898 downstream target gene alphaB-crystallin (Hspb5) impairs p53 degradation. *J Cell Biochem* **107**,  
899 504-515 (2009).
- 900 82. Muller, L., Schaupp, A., Walerych, D., Wegele, H. & Buchner, J. Hsp90 regulates the activity of  
901 wild type p53 under physiological and elevated temperatures. *J Biol Chem* **279**, 48846-48854  
902 (2004).
- 903 83. Walerych, D. *et al.* Hsp90 chaperones wild-type p53 tumor suppressor protein. *J Biol Chem* **279**,  
904 48836-48845 (2004).
- 905 84. Walerych, D. *et al.* Hsp70 molecular chaperones are required to support p53 tumor suppressor  
906 activity under stress conditions. *Oncogene* **28**, 4284-4294 (2009).
- 907 85. Jacks, T. *et al.* Tumor spectrum analysis in p53-mutant mice. *Curr Biol* **4**, 1-7 (1994).

908

909

910

911

912

913

## 914 **Online METHODS**

### 915 **Mouse experiments and genotyping**

916 Experiments using animal materials were approved by institutional (Göttingen University  
917 Medical Center Ethikkommission) and state (Niedersächsisches Landesamt für  
918 Verbraucherschutz und Lebensmittelsicherheit, LAVES, Lower Saxony, Germany) committees,  
919 ensuring that all experiments conform to the relevant regulatory standards.

920  
921 The humanized constitutive *TP53*<sup>R248Q</sup> (called p53<sup>Q</sup>) knock-in allele has been described in  
922 detail<sup>1-3</sup>. Briefly, the human *TP53* sequence containing the R248Q mutation in exon 7 replaces  
923 part of the mouse *Trp53* (exons 4-9). To generate heterozygous mice with one conditional  
924 murine *Trp53* wildtype allele (p53<sup>fl</sup>), we crossed mice harboring the p53<sup>Q</sup> allele with mice  
925 harboring the floxed WTp53 allele<sup>4</sup> flanked by loxP sites in introns 2 and 10 to generate p53<sup>Q/fl</sup>.  
926 To remove the floxed WTp53 allele from colonic epithelial tissue, we crossed p53<sup>Q/fl</sup> mice with  
927 *villinCreER*<sup>T2</sup> (called 'ERT2') transgenic mice.

928 Moreover, the classic *Trp53* knock-out mice (p53<sup>-/-</sup> mouse)<sup>5</sup> were crossed to the p53<sup>Q</sup> allele to  
929 generate non-tissue specific TP53 alterations (e.g. Supplemental Figure 1, Supplemental Figure  
930 2) as described in Schulz-Heddergott et al. 2018<sup>3</sup>.

931 For all genotypings, we isolated DNA with DirectPCR lysis Reagent (tail) (7Bioscience GmbH).  
932 PCR was performed with OneTaq® Quick-Load® 2X Master Mix (New England Biolabs)  
933 according to the manufacturer's guidelines using the primers specified in Table S1.

934 All mouse strains were maintained on a C57BL/6 background for at least 6 generations. For  
935 experiments, randomly assigned 10 wk old males and females weighing at least 20 g were  
936 used. Mice were kept under pathogen-free barrier conditions.

937

### 938 **Cell culture, treatment and transfection**

939 Human colorectal cancer cell lines RKO, LS513, LS174T (all harboring WTp53) and SW480  
940 (harboring mutp53 R273H) were cultured in RPMI 1640 medium, isogenic HCT116 WTp53 and  
941 HCT115 p53null were cultured in McCoys medium, all supplemented with glutamine, 10% fetal  
942 bovine serum and penicillin/streptomycin and grown in a humidified atmosphere at 37°C with  
943 5% CO<sub>2</sub>. All cell lines were regularly tested for mycoplasma contamination using the MycoAlert  
944 Mycoplasma detection kit (Lonza).

945 siRNAs were purchased from Ambion/Thermo Fisher Scientific (siRNAs are specified in Table  
946 1) and transfected with Lipofectamine 2000 (Invitrogen). Nutlin-3a (BOC Biosciences),  
947 Palbociclib (Sigma), Idasanutlin (RG3788, SelleckChem), RG7112 (SelleckChem), RO-3306

948 (Sigma) and Roscovitine (Cell Signaling) were dissolved according to manufacturer's guidelines  
949 and used as indicated.

950 For stable HSF1 expression in HCT116 cells, HEK-293 cells were co-transfected with lentiviral  
951 packaging vectors (*pMD2.G* from Addgene and *pCMV-R8.91* from PlasmidFactory Bielefeld)  
952 and the Precision LentiORF HSF1 lentiviral plasmid (Id:PLOHS\_100008319) or a Precision  
953 control plasmid (Dharmacon). After standard lentivirus production, HCT116 cells were  
954 transduced in the presence of 8 µg/mL polybrene and cells were selected with Hygromycin for  
955 several days. Single cell clones were expanded and validated for HSF1 overexpression by  
956 immunostaining with phospho-Ser326 HSF1 (Abcam). Cell clones (HSF1c1, HSF1c2 and ORF  
957 control) were cultured in McCoy's medium and supplemented as described above.

958

### 959 **CRC induction, colonoscopy and treatment**

960 Murine colorectal carcinoma (CRC) was induced by a single intraperitoneal injection of the  
961 colon-selective carcinogen Azoxymethane (AOM, 10 mg/kg in 0.9% sodium chloride, Sigma) at  
962 the age of 10 wks. After one week rest, an acute colitis was induced with 1.5% (in p53-deficient  
963 mice) or 1.8% (in p53-proficient mice) dextran sodium sulfate (DSS, MP Biomedicals) for 6 days  
964 in the drinking water.

965 Visualization of tumor growth by mini endoscopy/colonoscopy (Karl Storz GmbH) started 6 wks  
966 after AOM induction. Tumor sizes were scored according to the Becker & Neurath score <sup>6</sup>.  
967 Briefly, tumor sizes are calculated relative to the width (luminal circumference) of the colon and  
968 scored as sizes 1–5 (S1-S5) with the following specifications: S1 = just detectable, S2 = 1/8 of  
969 the lumen, S3 = 1/4 of the lumen, S4 = 1/2 of the lumen and S5 > 1/2 of the lumen. Notably,  
970 between 6-8 wks post AOM approximately 80% of mice had at least one S3 tumor and at least  
971 three S2 tumors.

972 As described in Schulz-Heddergott et al., 2018, for analysis of *TP53*<sup>R248Q</sup> mice with either a  
973 constitutive p53 wildtype (+) or KO (-) allele, we chose an endpoint type of analysis, ending at  
974 12 wks after AOM in p53-proficient mice (at least one WTp53 allele), or at 10 wks after AOM in  
975 all p53-deficient mice (deleted or mutated). This design prevented loss of mice due to colonic  
976 obstruction, anal prolapse, or lymphoma development in p53-deficient mice.

977 For analysis of the inducible p53LOH mouse model we used the *TP53*<sup>R248Q</sup> allele combined with  
978 the conditional floxed WTp53 allele (*p53*<sup>fl</sup>) to create heterozygous *p53*<sup>Q/fl</sup>; *vilCreER*<sup>T2</sup> tumors. We  
979 specifically induced p53LOH after a defined endoscopy-verified tumor burden was reached (at  
980 least one S3 tumor in addition to at least three S2 tumors). After tumor verification, Tamoxifen

981 (TAM, Sigma) was given by 7 serial intraperitoneal injections (1 mg daily per injection in a 1:10  
982 ethanol/oil mixture) to activate the inducible recombinase (*villinCreER<sup>T2</sup>*) and cause p53LOH.  
983 Tumor growth was continued to be visualized by colonoscopy over 2 - 8 wks after LOH  
984 induction by TAM.

985 At endpoints all mice were euthanized and the entire colon and rectum were harvested. Colons  
986 were longitudinally opened, cleaned and displayed. Tumor numbers were counted and tumor  
987 sizes measured with a caliper. Tumor biopsies were taken from all mice. To ensure complete  
988 sampling of the organ, each colon/rectum was 'swiss rolled', fixed in 4% paraformaldehyde/PBS  
989 and bisected. Both halves were placed face down side-by-side into a single cassette for  
990 histologic processing, paraffin embedding and subsequent tissue analysis.

991 Nutlin-3a (BOC Biosciences) treatment was given by oral gavage with 150 mg/kg per dose over  
992 3 consecutive days. Mice were sacrificed and colorectal tumors harvested 8 wks after the last  
993 treatment.

994

### 995 **Histological analysis**

996 Standardized immunohistochemical stainings were performed on murine formalin-fixed paraffin-  
997 embedded (FFPE) tissues. The following primary antibodies were used: p53 FL393 (Santa  
998 Cruz, sc-6243), pan-Cytokeratin (Abcam, ab9377) and  $\alpha$ -smooth muscle actin/SMA (Abcam,  
999 ab21027). The ImmPRESS™ Peroxidase polymer reagent based on 3, 3-diaminobenzidine  
1000 (DAB, Vectorlabs), or Alexa Fluor®488-coupled and Alexa Fluor®647-coupled secondary  
1001 antibodies (immunofluorescence) were used as detection systems. Hematoxylin (DAB) or DAPI  
1002 (immunofluorescence) were used as counterstains.

1003 To define invasive mouse CRC tumor stages we used the following definition: cancer grown  
1004 through the muscularis mucosae into the submucosa (=T1), cancer grown through the  
1005 muscularis mucosae and submucosa into the muscularis propria (=T2), cancer grown into the  
1006 outermost layers of the colon or rectum and reaching the serosa (=T3). No spread to nearby  
1007 lymph nodes or distant metastasis were overserved.

1008

### 1009 **Immunoblots**

1010 Whole cell protein lysates were prepared with RIPA buffer (1% TritonX-100, 1% Desoxycholate,  
1011 0.1% SDS, 150mM NaCl, 10mM EDTA, 20mM Tris-HCl pH7.5 and complete protease inhibitor  
1012 mix, Roche). Tumor tissues were minced and lysed with RIPA buffer followed by sonication.  
1013 After centrifugation, protein concentrations were determined by BCA protein assay (Pierce).  
1014 Equal amounts of protein lysates were separated by SDS-polyacrylamide gel electrophoresis

1015 (PAGE), transferred onto nitrocellulose membranes (Millipore), blocked with 5% milk and  
1016 probed with the following antibodies: murine p53 (CM5, Vector Laboratories), human p53 (DO-  
1017 1, Santa Cruz sc-126), total HSF1, pMEK1 and CDK1 (all Santa Cruz), HSP90 $\alpha$  (Millipore),  
1018 HSP27, AKT, cRAF, Bcl-XI, CDKN1A/p21, phospho-RB and phospho-S6 (all Cell Signaling),  
1019 MLK3, phospho-Ser326 HSF1 and CDK2 (all Abcam), PLK4 (Protein Technologies), GAPDH  
1020 and beta-Actin (both Abcam). Detailed information of antibodies are listed in Table 1.

1021

## 1022 **Quantitative PCR**

1023 Total RNA from cells, tumor tissues or organoids was isolated using the Trizol reagent following  
1024 manufacturers' guideline (Invitrogen/Thermo Fisher Scientific). Tumor tissues were first  
1025 homogenized using a homogenizer (T10 basic ULTRA-TURRAX). Equal amounts of RNA were  
1026 reverse-transcribed (M-MuLV Reverse Transcriptase, NEB), and quantitative real-time PCR  
1027 (qRT-PCR) analysis was performed using a qPCR Master-Mix (75 mM Tris-HCl pH 8.8, 20 mM  
1028 (NH<sub>4</sub>)<sub>2</sub>SO<sub>4</sub>, 0.01% Tween-20, 3 mM MgCl<sub>2</sub>, SYBR Green 1:80,000, 0.2 mM dNTPs, 20 U/ml  
1029 Taq-polymerase, 0.25% TritonX-100, 300mM Trehalose). Primers are specified in Table S1.

1030

## 1031 **Dual Luciferase Reporter (DLR) Assay**

1032 HSF1 firefly luciferase plasmids harboring seven HSE elements (pGL4.41[*luc2P*/HSE/Hygro]  
1033 vector) and the pRL (Renilla) luciferase reporter plasmid (pRL-TK) were purchased from  
1034 Promega. Cells were seeded and 24 hrs later were co-transfected with 100 ng HSF1*Luc*  
1035 plasmids and 200 ng pRL-TK plasmid using Lipofectamine 2000 (Invitrogen). 48 hrs post-  
1036 transfection, cells were treated with Nutlin as indicated and firefly luciferase and Renilla  
1037 luciferase activities were measured using a Dual Luciferase Assay. Briefly, cells were lysed with  
1038 PLB (Passive Lysis Buffer, 5X E194A) and incubated for 15 min. Supernatants were first  
1039 incubated and measured with firefly luciferase buffer (25 mM Glycylglycine, 15 mM K<sub>2</sub>HPO<sub>4</sub>, 4  
1040 mM EGTA pH 8.0, 15 mM MgSO<sub>4</sub>, 4 mM ATP pH 7.0, 1.25 mM DTT, 0.1 mM CoA, 80  $\mu$ M  
1041 Luciferin) and then with Renilla luciferase buffer (1,1 M NaCl, 2.2 mM Na<sub>2</sub>EDTA, 0.22 M  
1042 K<sub>2</sub>HPO<sub>4</sub> pH 5.1, 0.5 mg/ml BSA, 1.5 mM NaN<sub>3</sub>, 1.5  $\mu$ M Coelenterazine). Relative light units  
1043 (RLUs) were measured in a Luminometer Berthold Centro LB 960 plate reader. Values were  
1044 normalized to Renilla activity and relativized to the control treatment.

1045

## 1046 **Murine organoids, media, culturing and treatment**



1047 For preparation of organoid media, HEK293T cells stably expressing mRspodin or mNoggin  
1048 (kindly provided by Dr. Tiago De Oliveira), or mWnt3a cells were cultured in DMEM (Gibco)  
1049 supplemented with GlutaMAX™ (Gibco), 10% FBS (Merck), Penicillin-Streptomycin (10,000  
1050 U/mL, Gibco) and Sodium Pyruvate (Gibco) in a humidified atmosphere at 37°C with 5 % CO<sub>2</sub>.  
1051 For HEK293T mRspodin-I 300 µg/mL Zeocin (InvivoGen, #ant-zn-05) and for HEK293T  
1052 mNoggin 500 µg/mL G418 (Geneticin, InvivoGen, #ant-gn-1) were added to the medium during  
1053 cultivation. After HEK293 cell expansions, culturing media were replaced by conditioned  
1054 medium (CM) containing Advanced DMEM/F-12 (Gibco) supplemented with GlutaMAX™  
1055 (Gibco), Penicillin-Streptomycin (10,000 U/mL, Gibco) and 10mM HEPES (Gibco). 50 mL of CM  
1056 were added per 175 cm<sup>2</sup> flask and HEK293 cells allowed to grow for one week. Each CM media  
1057 were sterily filtered and aliquoted. Since mRspodin-I and mNoggin proteins are each fused to  
1058 an Fc-tag, the quality of each batch was tested by Dot-blot analysis. Organoid media was  
1059 composed of 50% CM Wnt3a, 20% CM mNoggin, 10% CM mRspodin-I, N2 and B27 (both  
1060 Gibco), 5 µM CHIR 99021 (Axon Medchem), 3.4 µg/mL ROCK inhibitor (Y-27632), 500 nM A83-  
1061 01, 10 mM Nicotinamide (Sigma-Aldrich), 80 µM N-Acetyl-L-Cysteine (all Sigma-Aldrich), and  
1062 200 ng/mL rmEGF (ImmunoTools).

1063 For organoid preparation, tumor-harboring mice were sacrificed and the colons harvested.  
1064 Tumors were dissected, washed and minced, and incubated with 2 mg/mL Collagenase type I  
1065 solution (Gibco, dissolved in Advanced DMEM/F12) at 37°C for 30 min, while pipetting up and  
1066 down every 10 min to dissociate the tumors. Small tumor fragments were transferred into a new  
1067 Falcon tube using a cell strainer (100 µm mesh size). Fragments were centrifuged and washed  
1068 with Advanced DMEM/F12. After centrifugation, tumor fragments were resuspended in cold  
1069 Matrigel (Corning) and plated as gel drops on culture plates. After Matrigel polymerization at  
1070 37°C, organoids were cultured in organoid media and cultivated in a humidified atmosphere at  
1071 37°C with 5% CO<sub>2</sub>. Medium was exchanged every 2-3 days. Splitting of organoids was  
1072 performed when organoids started to accumulate dead cells in the lumen (approx. once a  
1073 week). To this end, organoids were recovered from Matrigel and disrupted manually by pipetting  
1074 using 1 ml blue tips. For enzymatic dissociation, organoids were incubated with 0.25% trypsin at  
1075 37 °C for 10 min, washed with Advanced DMEM/F12, centrifuged and cultured as described  
1076 above. Experiments with murine colonic organoids were done between passage 3 and 8.  
1077 p53LOH was induced with 1 µM 4OHT (Sigma) for 24 - 48 hrs (as indicated in the figure  
1078 legends) in CHIR 99021-free and Rock-free organoid media.

1079



## 1080 **Immunofluorescence staining of organoids**

1081 Organoids were fixed within Matrigel domes with 2% / 0.1% Paraformaldehyde/Glutaraldehyde  
1082 /PBS for 30 min. After intensively washing steps with PBS, gel domes with fixed organoids were  
1083 removed from the plate and transferred into a tube. Sucrose infiltration was started with 20%  
1084 sucrose / PBS, followed by 40 % sucrose / PBS, each incubated over night or longer at 4°C until  
1085 the domes settled down. After sucrose infiltration, organoids were embedded in TissueTEK  
1086 (Tissue-Tek® O.C.T™ Compound) and 10 µM cryo-sections were cut. Sections were air-dried  
1087 for 30 min at RT, pre-wetted with PBS and quenched with 10 mM NaBH<sub>4</sub> / PBS twice for 5  
1088 minutes at room temperature each time. After washing steps, samples were permeabilised with  
1089 0.1% TritonX-100 / PBS for 10 min at RT and blocked with 10% FBS / 1% BSA / PBS for 1 hour.  
1090 For staining, samples were co-incubated with the p53 antibody FL393 (Santa Cruz) and E-  
1091 Cadherin (BD Biosciences) overnight at 4°C. Primary antibodies were detected by  
1092 AlexaFluor488- and AlexaFluor647- conjugated secondary antibodies (Molecular Probes).  
1093 Organoids were DAPI counterstained and mounted in Fluoromount media (DAKO). Images  
1094 were taken using a standard fluorescence microscope (Carl Zeiss AG) with the ZEN imaging  
1095 program from Zeiss. Figures were further prepared using Adobe Photoshop software.

1096

## 1097 **Analysis of human patient TCGA data**

1098 We used TCGA (The Cancer Genome Atlas) colorectal cancer (COARDREAD) and breast  
1099 cancer (BRCA) databases in this analysis. Human genomic data including RNA expression,  
1100 DNA copy number alteration, gene mutation, and clinical information was downloaded from  
1101 cBioPortal for cancer genomics (<http://www.cbioportal.org>). Study names: Colorectal  
1102 adenocarcinoma (TCGA, PanCancer Atlas, 594 total samples) and Breast Invasive Carcinoma  
1103 (TCGA, PanCancer Atlas, 1084 total samples). TP53 wild type (WTp53) group are those  
1104 samples without TP53 mutations. TP53 missense mutant group was samples with TP53  
1105 missense mutations (MS), and TP53 LOF group was determined by samples with all TP53  
1106 mutations (MS, missense; FS, frameshift; NS, nonsense). To identify tumors harboring p53LOH,  
1107 we selected samples that had both a mutated TP53 gene and a shallow deletion in DNA copy  
1108 number. The list of HSF1 target genes was chosen from Mendillo et al.<sup>7</sup> We compared the  
1109 expression values (by RNAseq) of HSF1 target genes from mutant p53/p53LOH tumors with  
1110 samples that harbored wildtype TP53 (TP53<sup>+/+</sup>). Further we applied survival analysis to check  
1111 patients with a missense TP53 mutation (MS p53) and a p53LOH compared to a WTp53 patient  
1112 group. R language (The R Project for Statistical Computing, <https://www.r-project.org>) was used  
1113 in the analysis. R package “gplots” was used to generate heatmaps. R package “survival” were

1114 used for survival analysis, including calculating log-rank p-values and generating Kaplan-Meier  
1115 curves.

1116

1117

## 1118 **QUANTIFICATION AND STATISTICAL ANALYSIS**

1119 Statistics of each experiment such as number of animals, number of tumors, biological  
1120 replicates, technical replicates, precision measures (mean and  $\pm$ SEM) and the statistical tests  
1121 used for significance are provided in the figures and figure legends.

1122 Unpaired Student's t test was used to calculate the p values for comparisons of tumor numbers  
1123 and sizes and mRNA expression levels.

1124 Densitometric measurements for quantification of immunoblot bands were done with the gel  
1125 analysis software Image Lab™ (BioRad) and normalized to loading controls.

1126 The following designations for levels of significance were used within this manuscript:  $p^* = 0.05$ ;  
1127  $p^{**} = 0.01$ ;  $p^{***} = 0.001$ ; ns, not significant.

1128

1129

1130 1.Hanel, W. *et al.* Two hot spot mutant p53 mouse models display differential gain of function in  
1131 tumorigenesis. *Cell Death Differ* **20**, 898-909 (2013).

1132 2.Alexandrova, E.M. *et al.* Improving survival by exploiting tumour dependence on stabilized mutant p53  
1133 for treatment. *Nature* **523**, 352-356 (2015).

1134 3.Schulz-Heddergott, R. *et al.* Therapeutic Ablation of Gain-of-Function Mutant p53 in Colorectal Cancer  
1135 Inhibits Stat3-Mediated Tumor Growth and Invasion. *Cancer Cell* **34**, 298-314 e297 (2018).

1136 4.Jonkers, J. *et al.* Synergistic tumor suppressor activity of BRCA2 and p53 in a conditional mouse model  
1137 for breast cancer. *Nat Genet* **29**, 418-425 (2001).

1138 5.Jacks, T. *et al.* Tumor spectrum analysis in p53-mutant mice. *Curr Biol* **4**, 1-7 (1994).

1139 6.Becker, C., Fantini, M.C. & Neurath, M.F. High resolution colonoscopy in live mice. *Nature protocols* **1**,  
1140 2900-2904 (2006).

1141 7.Mendillo, M.L. *et al.* HSF1 drives a transcriptional program distinct from heat shock to support highly  
1142 malignant human cancers. *Cell* **150**, 549-562 (2012).

1143

1144

1145

1146

1147

1148

1149 Table 1, related to online Methods:: Reagents and Resources

| REAGENT or RESOURCE                                            | SOURCE                        | IDENTIFIER                       |
|----------------------------------------------------------------|-------------------------------|----------------------------------|
| <b>Antibodies</b>                                              |                               |                                  |
| Rabbit polyclonal anti-p53 (FL-393)                            | Santa Cruz                    | Cat# sc-6243; RRID:AB_653753     |
| Goat polyclonal anti- $\alpha$ SMA                             | Abcam                         | Cat# ab21027, RRID:AB_1951138    |
| Mouse monoclonal anti-E-Cadherin                               | BD Biosciences                | Cat# 610181; RRID:AB_397580      |
| Mouse monoclonal anti-p53 (DO-1)                               | Santa Cruz                    | Cat# sc-126; RRID:AB_628082      |
| Rabbit monoclonal phospho-Ser326-HSF1                          | Abcam                         | Cat# ab76076; RRID:AB_1310328    |
| Rabbit polyclonal anti-HSF1 (H-311)                            | Santa Cruz                    | Cat# sc-9144; RRID:AB_2120276    |
| Rabbit monoclonal anti-HSP27 (E1J4D)                           | Cell Signaling                | Cat# 50353; RRID:AB_2799374      |
| Rabbit polyclonal anti-Heat Shock Protein 90alpha              | Millipore                     | Cat# 07-2174; RRID:AB_10807022   |
| Rabbit polyclonal anti-AKT                                     | Cell Signaling                | Cat# 9272; RRID:AB_329827        |
| Mouse monoclonal anti-beta-actin                               | Abcam                         | Cat# ab6276; RRID:AB_2223210     |
| Rabbit polyclonal anti-c-Raf                                   | Cell Signaling                | Cat# 9422; RRID:AB_390808        |
| Rabbit monoclonal anti-p21 Waf1/Cip1 (12D1)                    | Cell Signaling                | Cat# 2947; RRID:AB_823586        |
| Rabbit monoclonal anti-phospho-Rb (Ser807/811) (D20B12) XP     | Cell Signaling                | Cat# 8516; RRID: AB_11178658     |
| Rabbit polyclonal anti-phospho-Ser235/236-S6 ribosomal protein | Cell Signaling                | Cat# 2211; RRID:AB_331679        |
| Rabbit monoclonal anti-MLK3 [EP1460Y]                          | Abcam                         | Cat# ab51068; RRID:AB_881140     |
| Rabbit polyclonal phospho-p-MEK-1/2 (Ser 218/Ser 222)          | Santa Cruz                    | Cat# sc-7995; RRID:AB_2234805    |
| Mouse monoclonal anti-GAPDH                                    | Abcam                         | Cat# ab8245; RRID:AB_2107448     |
| Mouse monoclonal anti-Cdc2 p34                                 | Santa Cruz                    | Cat# sc-54; RRID:AB_627224       |
| Rabbit monoclonal anti-CDK2                                    | Abcam                         | Cat# ab32147; RRID:AB_726775     |
| Rabbit polyclonal anti-PLK4                                    | Protein Technologies          | Cat# 12952-1-AP; RRID:AB_2284150 |
| Alexa Fluor®488 Goat anti-rabbit IgG (H+L)                     | ThermoFisher                  | Cat# A-11034; RRID:AB_2576217    |
| Alexa Fluor®488 Donkey anti-mouse IgG (H+L)                    | ThermoFisher                  | Cat# A-21202; RRID:AB_141607     |
| Alexa Fluor®546 Donkey anti-rabbit IgG (H+L)                   | ThermoFisher                  | Cat# A-10040; RRID:AB_2534016    |
| ImmPRESS™ Peroxidase polymer reagent                           | VectorLabs                    | Cat# MP-7401, RRID:AB_2336529    |
| <b>Bacterial and Virus Strains</b>                             |                               |                                  |
| Bacteria: ElectroMAX DH10B cells                               | Invitrogen/Thermo Fisher Sci. | Cat# 18290-015                   |
| <b>Chemicals, Peptides, and Recombinant Proteins</b>           |                               |                                  |
| AOM (Azoxymethane)                                             | Sigma Aldrich                 | Cat# A5486                       |
| DSS (Dextran sodium sulfate)                                   | MP Biomedicals                | Cat# 160110                      |
| TAM (Tamoxifen)                                                | Sigma Aldrich                 | Cat# T5648                       |
| (Z)-4-Hydroxytamoxifen (4-OHT)                                 | Sigma Aldrich                 | Cat# H7904                       |
| Lipofectamine2000                                              | Invitrogen                    | Cat# 11668-019                   |
| Trizol                                                         | Invitrogen                    | Cat# 15596026                    |
| Phusion® High-Fidelity DNA Polymerase                          | Thermo Fisher Sci.            | Cat# F530                        |
| PD 0332991 isethionate (Palbociclib)                           | Sigma Aldrich                 | Cat# PZ0199                      |
| RO-3306                                                        | Sigma Aldrich                 | Cat# SML0569                     |
| Roscovitine                                                    | Cell Signaling                | Cat# 9885                        |
| RG-7112                                                        | SelleckChem                   | Cat# S7030                       |

|                                                                    |                                                |                                     |
|--------------------------------------------------------------------|------------------------------------------------|-------------------------------------|
| Idasanutlin (RG-7388)                                              | SelleckChem                                    | Cat# S7205                          |
| Nutlin-3a (MDM2 inhibitor)                                         | BOC Sciences                                   | Cat# 675576-98-4                    |
| Passive Lysis Buffer, 5X                                           | Promega                                        | Cat# E194A                          |
| <b>Experimental Models: Cell Lines</b>                             |                                                |                                     |
| HCT116                                                             | ATCC                                           | Cat# ATCC® CCL-247™                 |
| HCT116-ORF                                                         | this work                                      | N/A                                 |
| HCT116-HSF1c1                                                      | this work                                      | N/A                                 |
| HCT116-HSF1c2                                                      | this work                                      | N/A                                 |
| RKO                                                                | ATCC                                           | Cat# ATCC® CRL-2577™                |
| LS513                                                              | ATCC                                           | Cat# ATCC® CRL-2134™                |
| HCT116 p53 <sup>-/-</sup>                                          | Bunz et al., 1998.                             | B. Vogelstein, Baltimore            |
| HCT116 p53 <sup>+/+</sup>                                          | Bunz et al., 1998.                             | B. Vogelstein, Baltimore            |
| LS174T                                                             | DSMZ                                           | Cat# ACC 759                        |
| SW480                                                              | DSMZ                                           | Cat# ACC 313                        |
| MCF-7                                                              | DSMZ                                           | Cat# ACC 115                        |
| MDA-MB-231                                                         | DSMZ                                           | Cat# ACC 732                        |
| HEK 293 Cell Line human (for viral transfection)                   | DSMZ                                           | Cat# 85120602                       |
| <b>Experimental Models: Organisms/Strains</b>                      |                                                |                                     |
| Mouse: p53 <sup>LoxP</sup> (p53 <sup>fl</sup> )                    | Jonkers J et al., 2001                         | Jax strain# 008462                  |
| Mouse: p53null (-/-) (B6.129S2-Trp53 <sup>&lt;tm1Tyj&gt;/J</sup> ) | Jacks T et al., 1994 or The Jackson Laboratory | Jax strain# 002101                  |
| Mouse: p53 <sup>R248Q</sup>                                        | Hanel et al., 2013                             | N/A                                 |
| Mouse: p53 <sup>flloxR248Q</sup> (p53 <sup>flloxQ</sup> )          | Alexandrova et al., 2015                       | N/A                                 |
| Mouse: villin:CreER <sup>T2</sup>                                  | N/A                                            | Jax strain# 020282                  |
| Mouse: C57BL/6NJ                                                   | N/A                                            | Jax strain# 005304                  |
| <b>Oligonucleotides</b>                                            |                                                |                                     |
| Primers for QPCR and genotyping, see below                         | this paper                                     | Table S1.                           |
| siRNA MLK3 Silencer® Select                                        | Ambion                                         | Pool of IDs: 8814+8815+8816         |
| siRNA CDC2 Silencer® Select                                        | Ambion                                         | ID: 464                             |
| siRNA CDC2 Silencer® Select                                        | Ambion                                         | ID: 465                             |
| siRNA CDK2 Silencer® Select                                        | Ambion                                         | ID: 205                             |
| siRNA CDK2 Silencer® Select                                        | Ambion                                         | ID: 206                             |
| siRNA PLK4 Silencer® Select                                        | Ambion                                         | ID: 21083                           |
| siRNA PLK4 Silencer® Select                                        | Ambion                                         | ID: 21084                           |
| siRNA TP53 Silencer® Select                                        | Ambion                                         | ID: s605                            |
| siRNA TP53 Silencer® Select                                        | Ambion                                         | ID: s607                            |
| siRNA CDKN1A Silencer® Select                                      | Ambion                                         | ID: 415                             |
| siRNA CDKN1A Silencer® Select                                      | Ambion                                         | ID: 417                             |
| siRNA Negative Control No. 2 (src2) Silencer® Select siRNA         | Ambion                                         | Cat# 4390847                        |
| <b>Recombinant DNA</b>                                             |                                                |                                     |
| pSUPER control vector for shRNA                                    | OligoEngine                                    | Cat# VEC-PBS-0002                   |
| pSUPER-p53 for shp53                                               | OligoEngine                                    | Cat# VEC-P53-0001                   |
| pMD2.G                                                             | Addgene                                        | Plasmid #12259                      |
| pCMV-R8.91                                                         | PlasmidFactory Bielefeld                       | Kramer et al., 2017. PMID: 27834954 |
| Precision LentiORF positive control                                | Dharmacon                                      |                                     |

|                                                    |                         |                                                                                                                               |
|----------------------------------------------------|-------------------------|-------------------------------------------------------------------------------------------------------------------------------|
| Precision LentiORF HSF1 w/o Stop Codon, Lentiviral | Dharmacon               | Catalog# OHS5898-202620209; Clone Id:PLOHS_100008319                                                                          |
| pGL4.41[ <i>luc2P/HSE/Hygro</i> ] vector           | Promega                 | Cat# E3751                                                                                                                    |
| pRL Renilla Luciferase Control Reporter Vectors    | Promega                 | Cat# E2241                                                                                                                    |
| <b>Software and Algorithms</b>                     |                         |                                                                                                                               |
| ImageJ software                                    | Open source             | <a href="https://imagej.net/Welcome">https://imagej.net/Welcome</a><br>PMID 22930834                                          |
| GraphPadPRISM®                                     | Graphpad Software, Inc. | <a href="https://www.graphpad.com/">https://www.graphpad.com/</a>                                                             |
| Image Lab™ Software                                | Biorad                  | <a href="http://www.bio-rad.com/de-de/product/image-lab-software">http://www.bio-rad.com/de-de/product/image-lab-software</a> |

1150

1151

1152

1153

1154

1155

1156

1157

1158

1159

1160

1161

1162

1163

1164

1165

1166

1167

1168

1169

1170 Table S2, related to online Methods: Primers for qPCR and genotyping.

| Gene                                       | Origin | Forward                         | Reverse                           |
|--------------------------------------------|--------|---------------------------------|-----------------------------------|
| <b>qPCR</b>                                |        |                                 |                                   |
| <i>HSP90AA1</i>                            | Human  | 5'-GCCCAGAGTGCTGAATACCC         | 5'-GTGGAAGGGCTGTTCCAGA            |
| <i>HSPA1A</i>                              | Human  | 5'-TCAAGGGCAAGATCAGCGAG         | 5'-TGATGGGGTTACACACCTGC           |
| <i>HSPH1</i>                               | Human  | 5'-ACTGCTTGTTCAGAGGGCTGTGA      | 5'-AACATCCACACCCACACACATGCT       |
| <i>HSPB1</i>                               | Human  | 5'-GGAGTGGTCGCAGTGGTTAG         | 5'-ATGTAGCCATGCTCGTCCTG           |
| <i>CDC6</i>                                | Human  | 5'-TAAAAGCCCTGCCTCTCAGC         | 5'-TGAGTGAGGGGGACCATTCT           |
| <i>ITGB3BP</i>                             | Human  | 5'-TCCCGAATCTCAGAATGCCTG        | 5'-TGACAAGTTCAGTTGTTGGAG          |
| <i>RBBP5</i>                               | Human  | 5'-AACTCAGCCAGCCCTTGAC          | 5'-GGCCACATGATGGCAAAGTG           |
| <i>BST2</i>                                | Human  | 5'-AGGAGCTTGAGGGAGAGATCA        | 5'-AGGACGGACCTTCCAAGATG           |
| <i>RPLP0</i> (36B4)                        | Human  | 5'-GATTGGCTACCCAACCTGTTG        | 5'-CAGGGGCAGCAGCCACAAA            |
| <i>TP53</i>                                | Human  | 5'-AAGTCTAGACCACCGTCCA          | 5'-CAGTCTGGCTGCCAATCCA            |
| <i>FBNL1</i>                               | Human  | 5'-CCGCAACTGCCAAGACATTGAT       | 5'-GACCGTGTCTGTCTTCTCCTG          |
| <i>CDKN1A</i>                              | Human  | 5'-TAGGCGGTTGAATGAGAGG          | 5'-AAGTGGGGAGGAGGAAGTAG           |
| <i>CDK1</i>                                | Human  | 5'-TTTTTCAGAGCTTTGGGCACT        | 5'-CCATTTTGCCAGAAATTCGT           |
| <i>CDK2</i>                                | Human  | 5'-GGATGCCTCTGCTCTCACTG         | 5'-ACAGGGTCACCACCTCATGG           |
| <i>CDC25c</i>                              | Human  | 5'-GTATCTGGGAGGACATCCAGGG       | 5'-CAAGTTGGTAGCCTGTTGGTTTG        |
| <i>PLK4</i>                                | Human  | 5'-CAAGCGGCGGGAGATTTTCA         | 5'-CAGCTCTGTAGACACCAGCAA          |
| <i>MLK3</i>                                | Human  | 5'-CACACCCCCAGCACTCAAT          | 5'-CGTCTTGAGCGAGAAGCAGA           |
| <i>Trp53</i> (Ex1-Ex3)                     | Mouse  | 5'-GTGCTCACCCCTGGCTAAAGT        | 5'-CAGTGAGGTGATGGCAGGAT           |
| <i>Ccnd1</i>                               | Mouse  | 5'-GGAGCTGCTGCAAATGGAAC         | 5'-CAGTCCGGGTCACACTTGA            |
| <i>Ccnb1</i>                               | Mouse  | 5'-CAGGGTCGTGAAGTGACTGG         | 5'-GGCACACAACCTGTTCTGCAT          |
| <i>Mdm2</i>                                | Mouse  | 5'-TAG CAG CCA AGA AAG CGT GA   | 5'-ATG AGG TGT CCA GTC TTG CC     |
| <i>Pcna</i>                                | Mouse  | 5'-AGTGGAGAGCTTGCCAATGG         | 5'-TCAGGTACCTCAGAGCAAACG          |
| <i>Cdkn1a</i> (p21)                        | Mouse  | 5'-GTGGCCTTGTGCGTGTCTT          | 5'-GCGCTTGAGTGATAGAAATCTG         |
| <i>Gadd45a</i>                             | Mouse  | 5'-GGCGTGTACGAGGCTGCCAA         | 5'-TGTCGTTCTCGCAGCAGAACG          |
| <i>Bbc3</i>                                | Mouse  | 5'-TTCTCCGGAGTGTTTCATGCC        | 5'-ATACAGCGGAGGGCATCAGG           |
| <i>Sfn</i>                                 | Mouse  | 5'-GCCCGGTCAGCCTACCAGGA         | 5'-CGGCTGTCCACAGCGTCAGG           |
| <i>HspH1</i>                               | Mouse  | 5'-AGA CCA TCG CCA ACG AGT TC   | 5'-ACA TGA CCT TTA TTC CCA CGC    |
| <i>HspE</i>                                | Mouse  | 5'-GGA GTG CTG CCG AAA CTG TA   | 5'-CCA ACT TTC ACA CTG ACA GGC    |
| <i>Hsp90AA1</i>                            | Mouse  | 5'-CGT CTC GTG CGT GTT CAT TC   | 5'-CCA GAG CGT CCG ATG AAT TG     |
| <i>Itgb3bp</i>                             | Mouse  | 5'-GTA TAC AGG CTT TGG AGG GCA  | 5'-TGA CAG TTG TCA GAC TTG AAG GT |
| <i>pre-miR34a</i>                          | Mouse  | 5'-GGTAGGGTCCACTACACATCTTTC     | 5'-CTAGGGCAGTATACTTGTGATTG        |
| <i>Snai1</i>                               | Mouse  | 5'-CTTGTGTCTGCACGACCTG          | 5'-GGTTGGAGCGGTACAGCAA            |
| <i>Vim</i>                                 | Mouse  | 5'-GGATCAGCTACCAACGACA          | 5'-AAGGTCAAGACGTGCCAGAG           |
| <i>Hprt1</i>                               | Mouse  | 5'-GCT TCC TCC TCA GAC CGC TT   | 5'-CCA GCA GGT CAG CAA AGA ACT    |
| <i>Rplp0</i> (36B4)                        | Mouse  | 5'-GCAGATCGGGTACCCAACCTGTT      | 5'-CAGCAGCCGCAAATGCAGATG          |
| <b>genotyping</b>                          |        |                                 |                                   |
| <i>Trp53</i> <sup>R248Q</sup> = WT         | Mouse  | 5'-GGAAGTCCTTTGCCCTGAA          | 5'-CACTGAAAAAGACCTGGCAACC         |
| <i>TP53</i> <sup>R248Q</sup> = humanized Q | Hu/Mus | 5'-AAGGGTGCAGTTATGCCTCA (Human) | ~                                 |

|                                               |       |                                |                                |
|-----------------------------------------------|-------|--------------------------------|--------------------------------|
| <i>Trp53</i> (X6-X7) = WT                     | Mouse | 5'-AGCGTGGTGGTACCTTATGAGC      | 5'-GGATGGTGGTATACTCAGAGCC      |
| <i>Trp53</i> (neo-X7) = Del                   | Mouse | 5'-GCTATCAGGACATAGCGTTGGC      | ~                              |
| <i>villinCreER<sup>flox</sup></i> = transgene | Mouse | 5'-CAA GCC TGG CTC GAC GGC C   | 5'- CGC GAA CAT CTT CAG GTT CT |
| <i>Trp53<sup>flox</sup></i> = WT and floxed   | Mouse | 5'- GGT TAA ACC CAG CTT GAC CA | 5- GGA GGC AGA GAC AGT TGG AG  |

1171

1172

1173



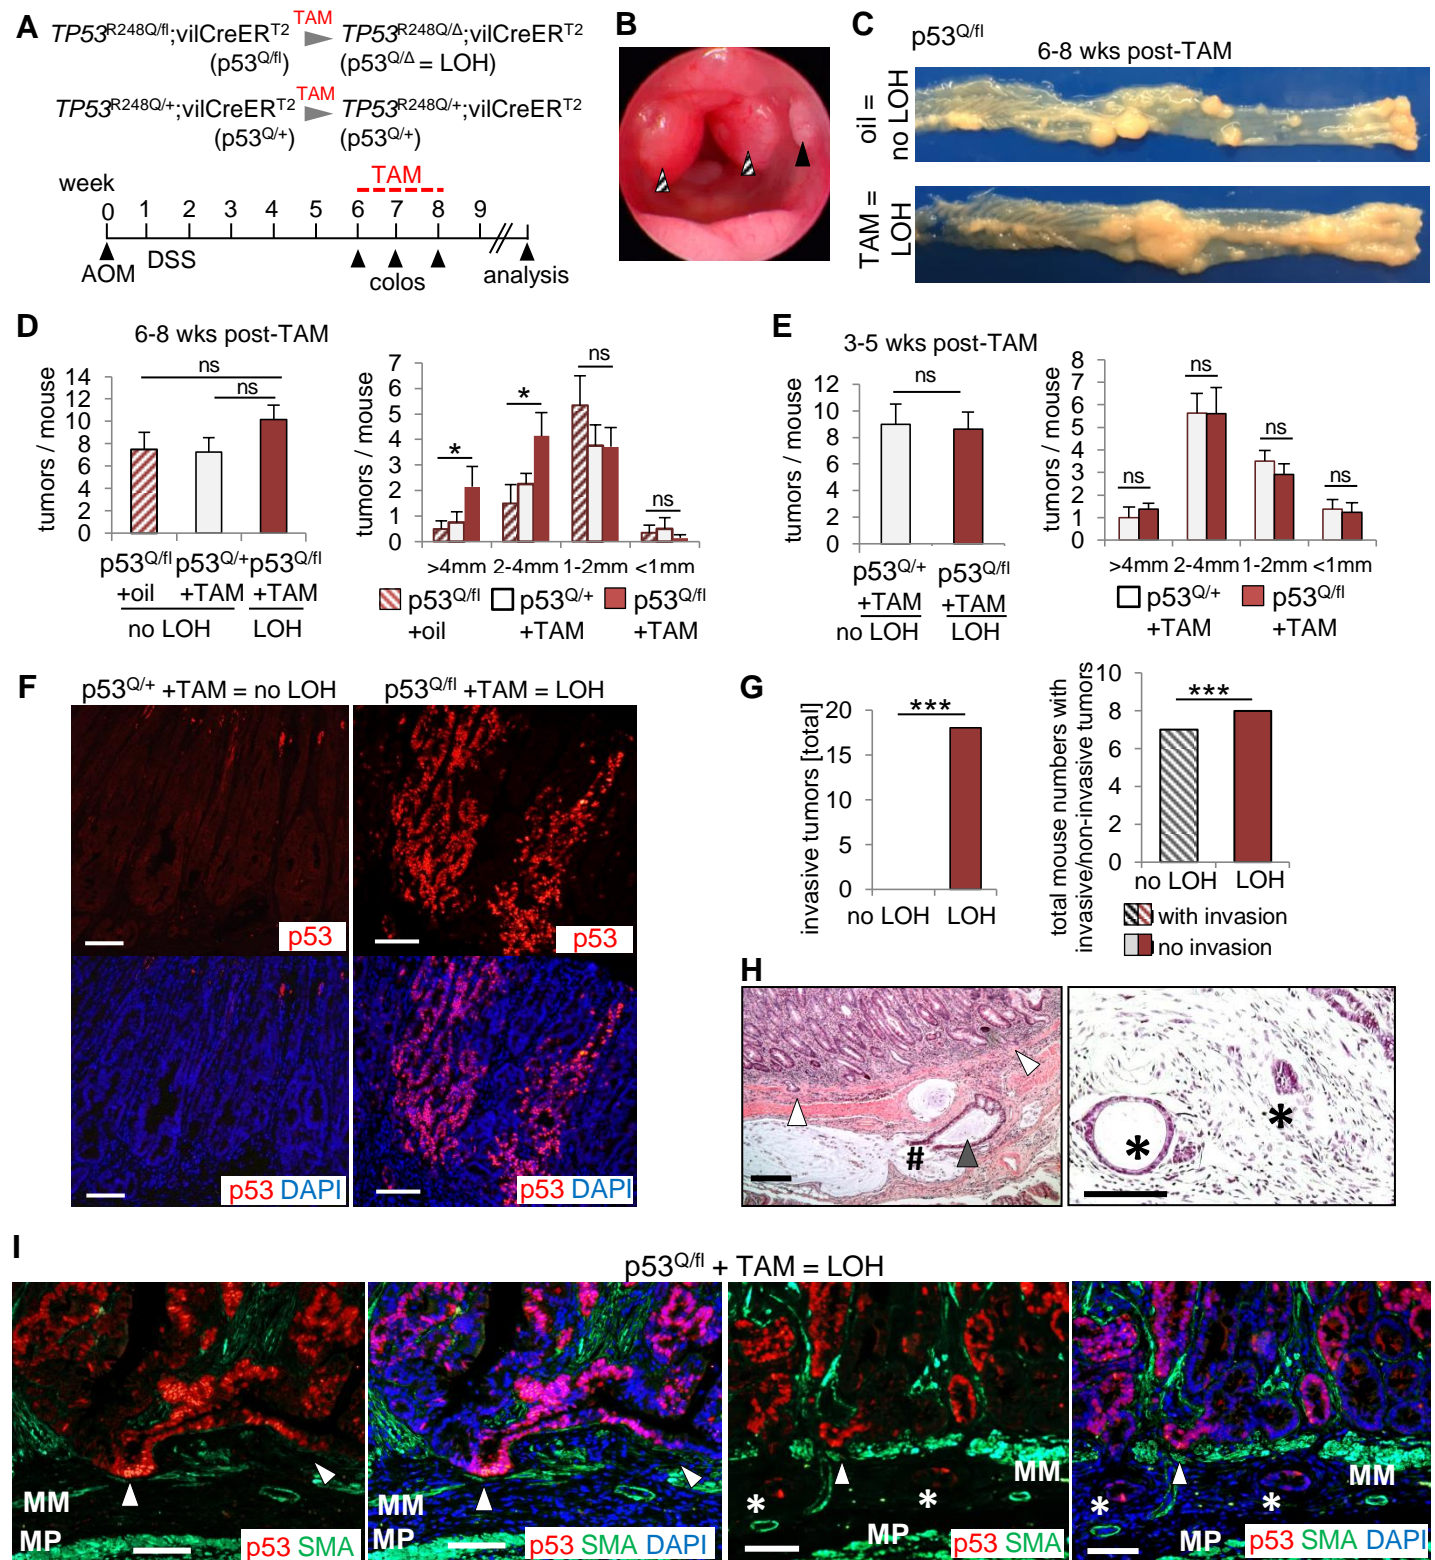

Figure 1

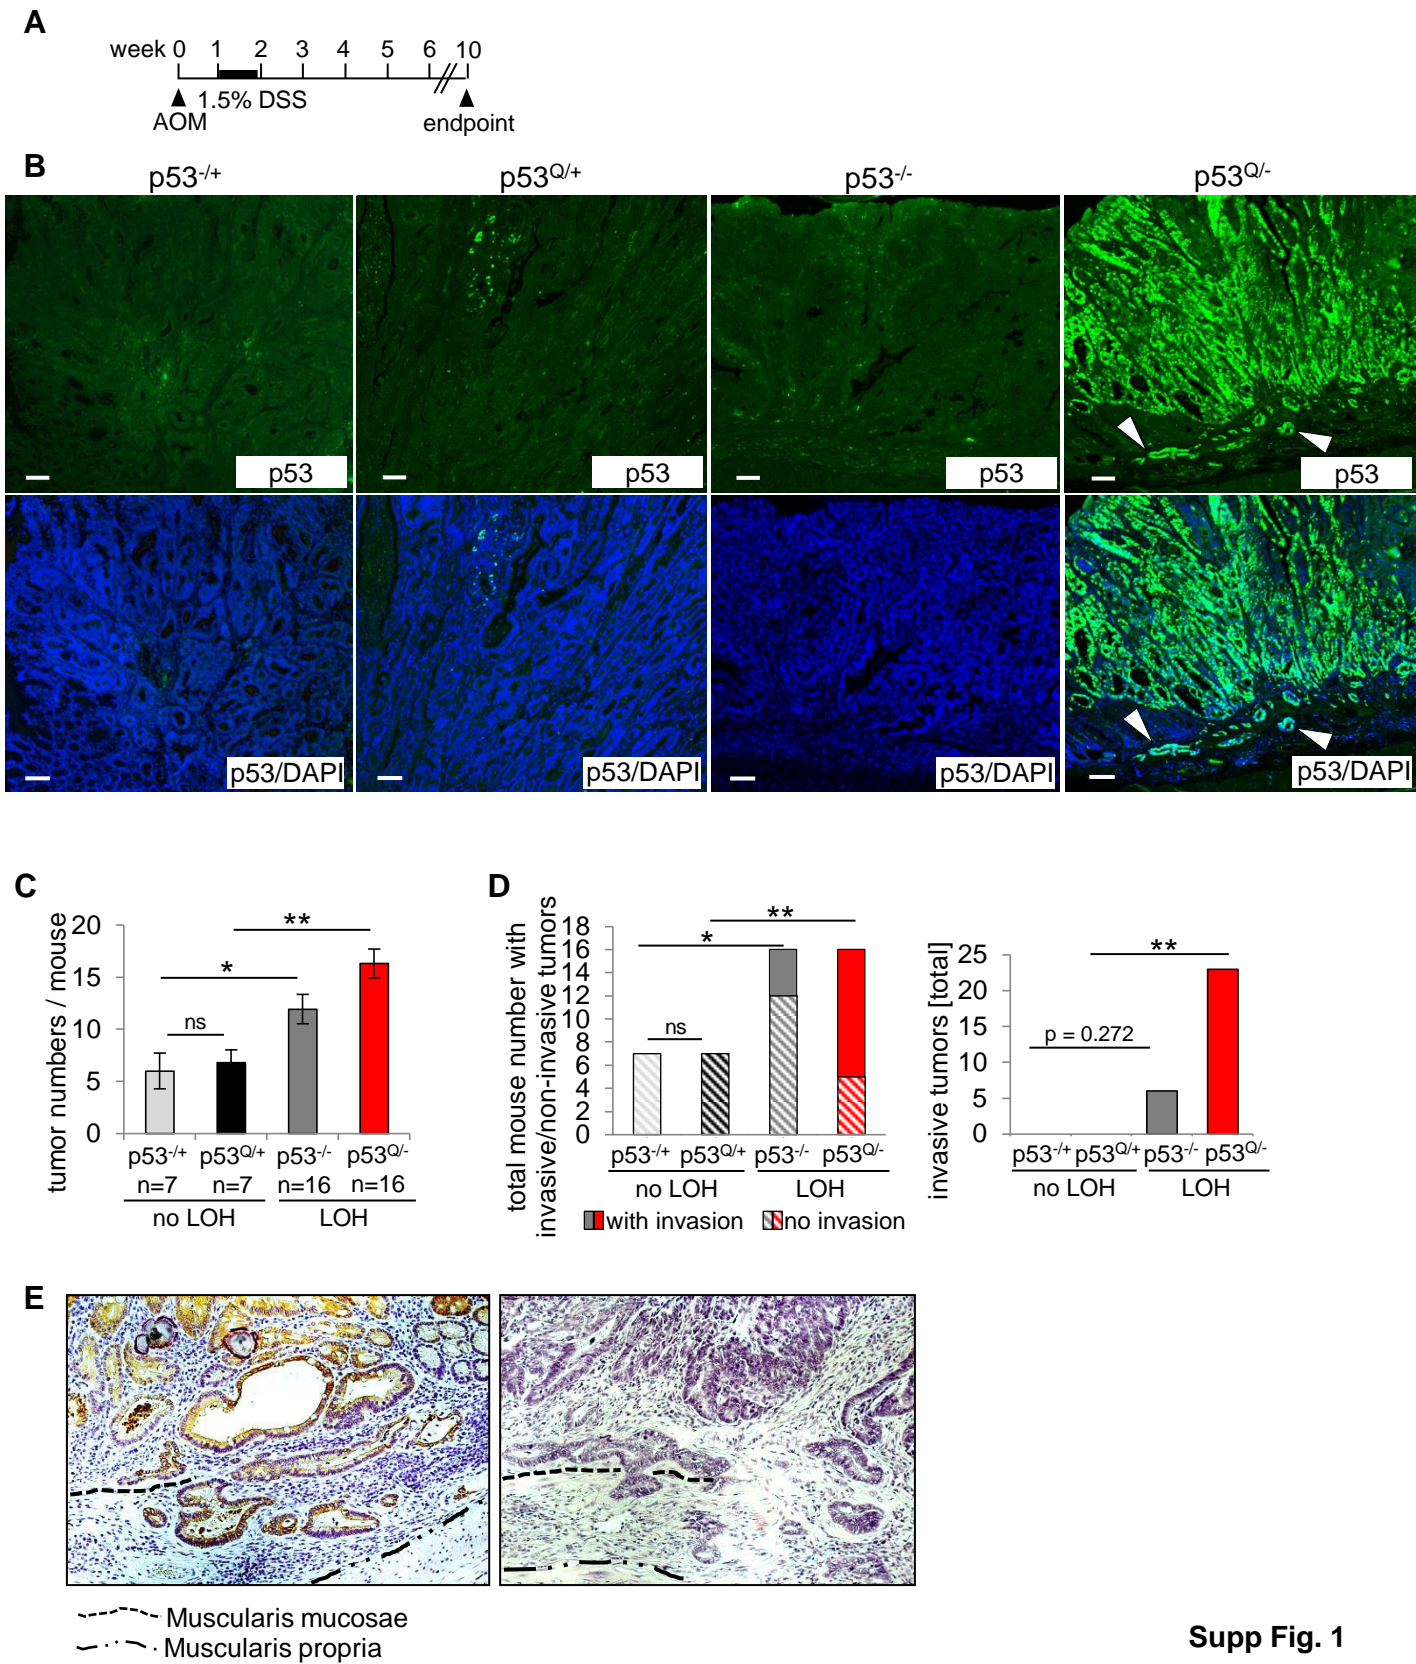

Supp Fig. 1

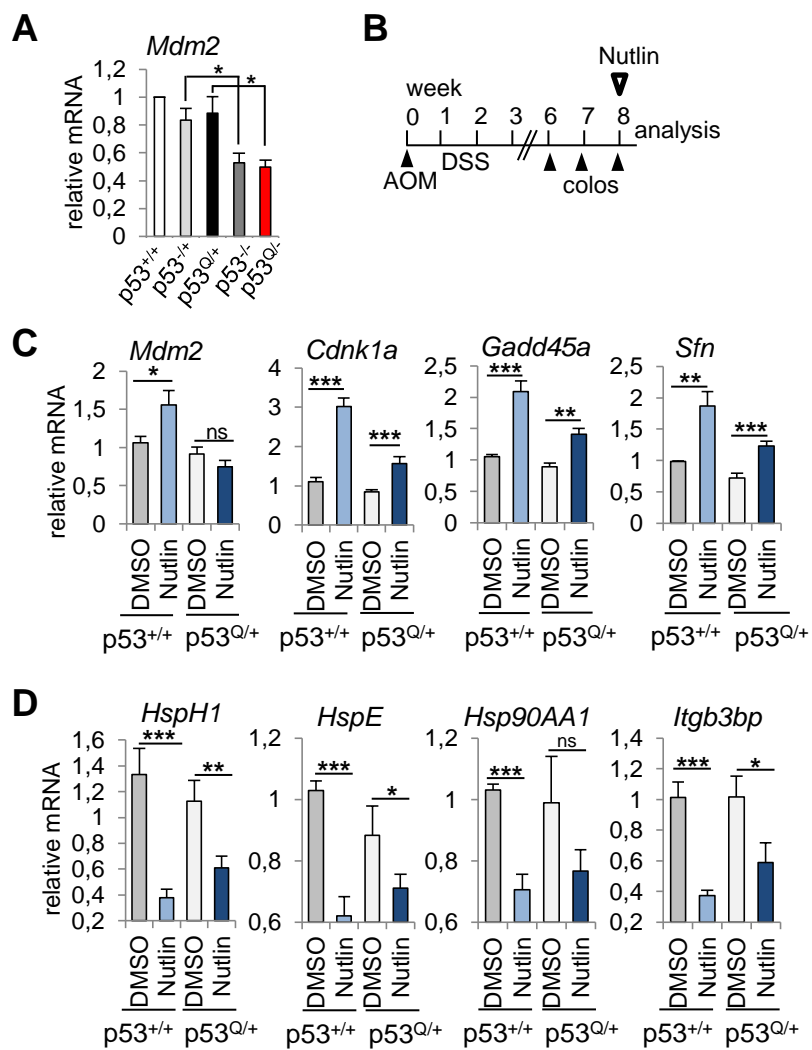

**Figure 2**



**A**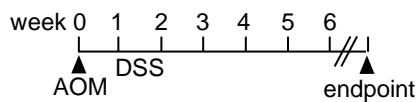

p53-deficient mice: 1.5% DSS with endpoint 10 wks  
 p53-proficient mice: 1.8% DSS with endpoint 12 wks

**B**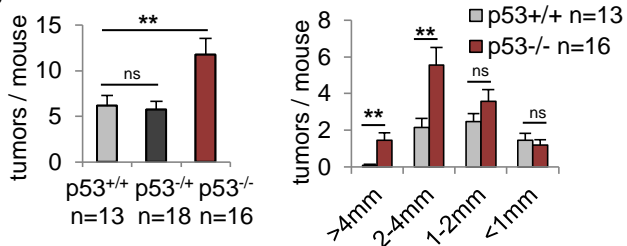**C**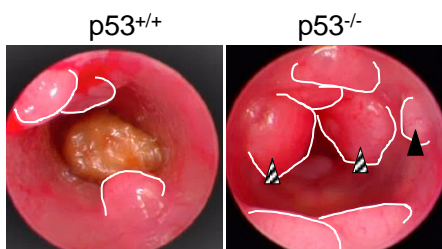**D**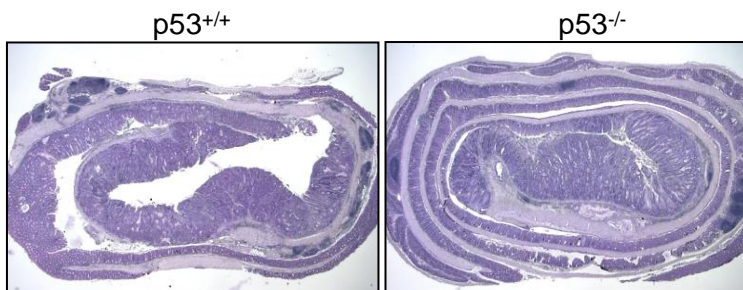**E**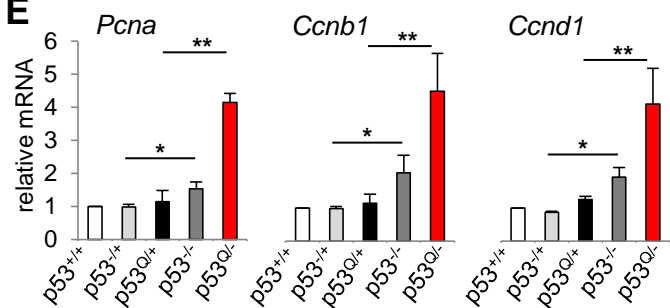**F**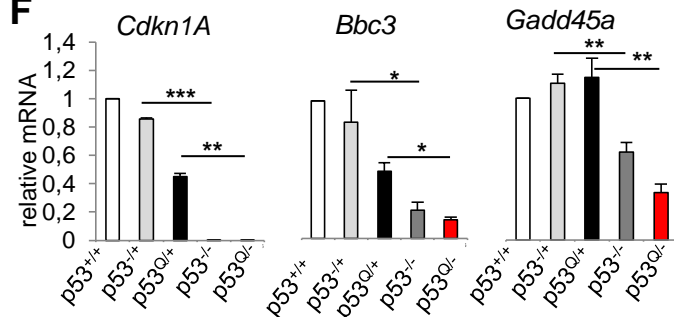**G**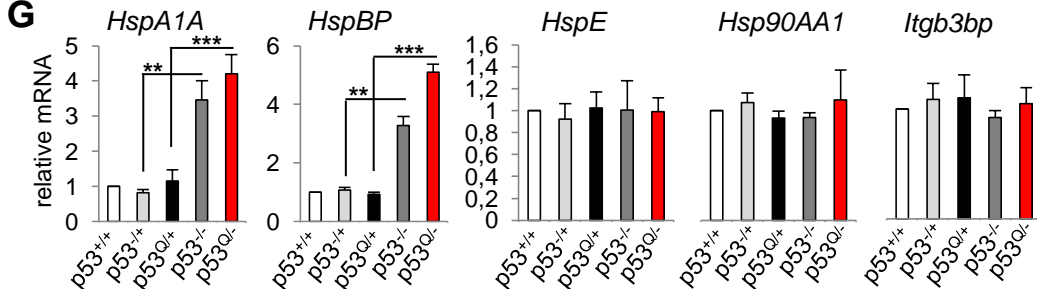

Supp Fig. 2

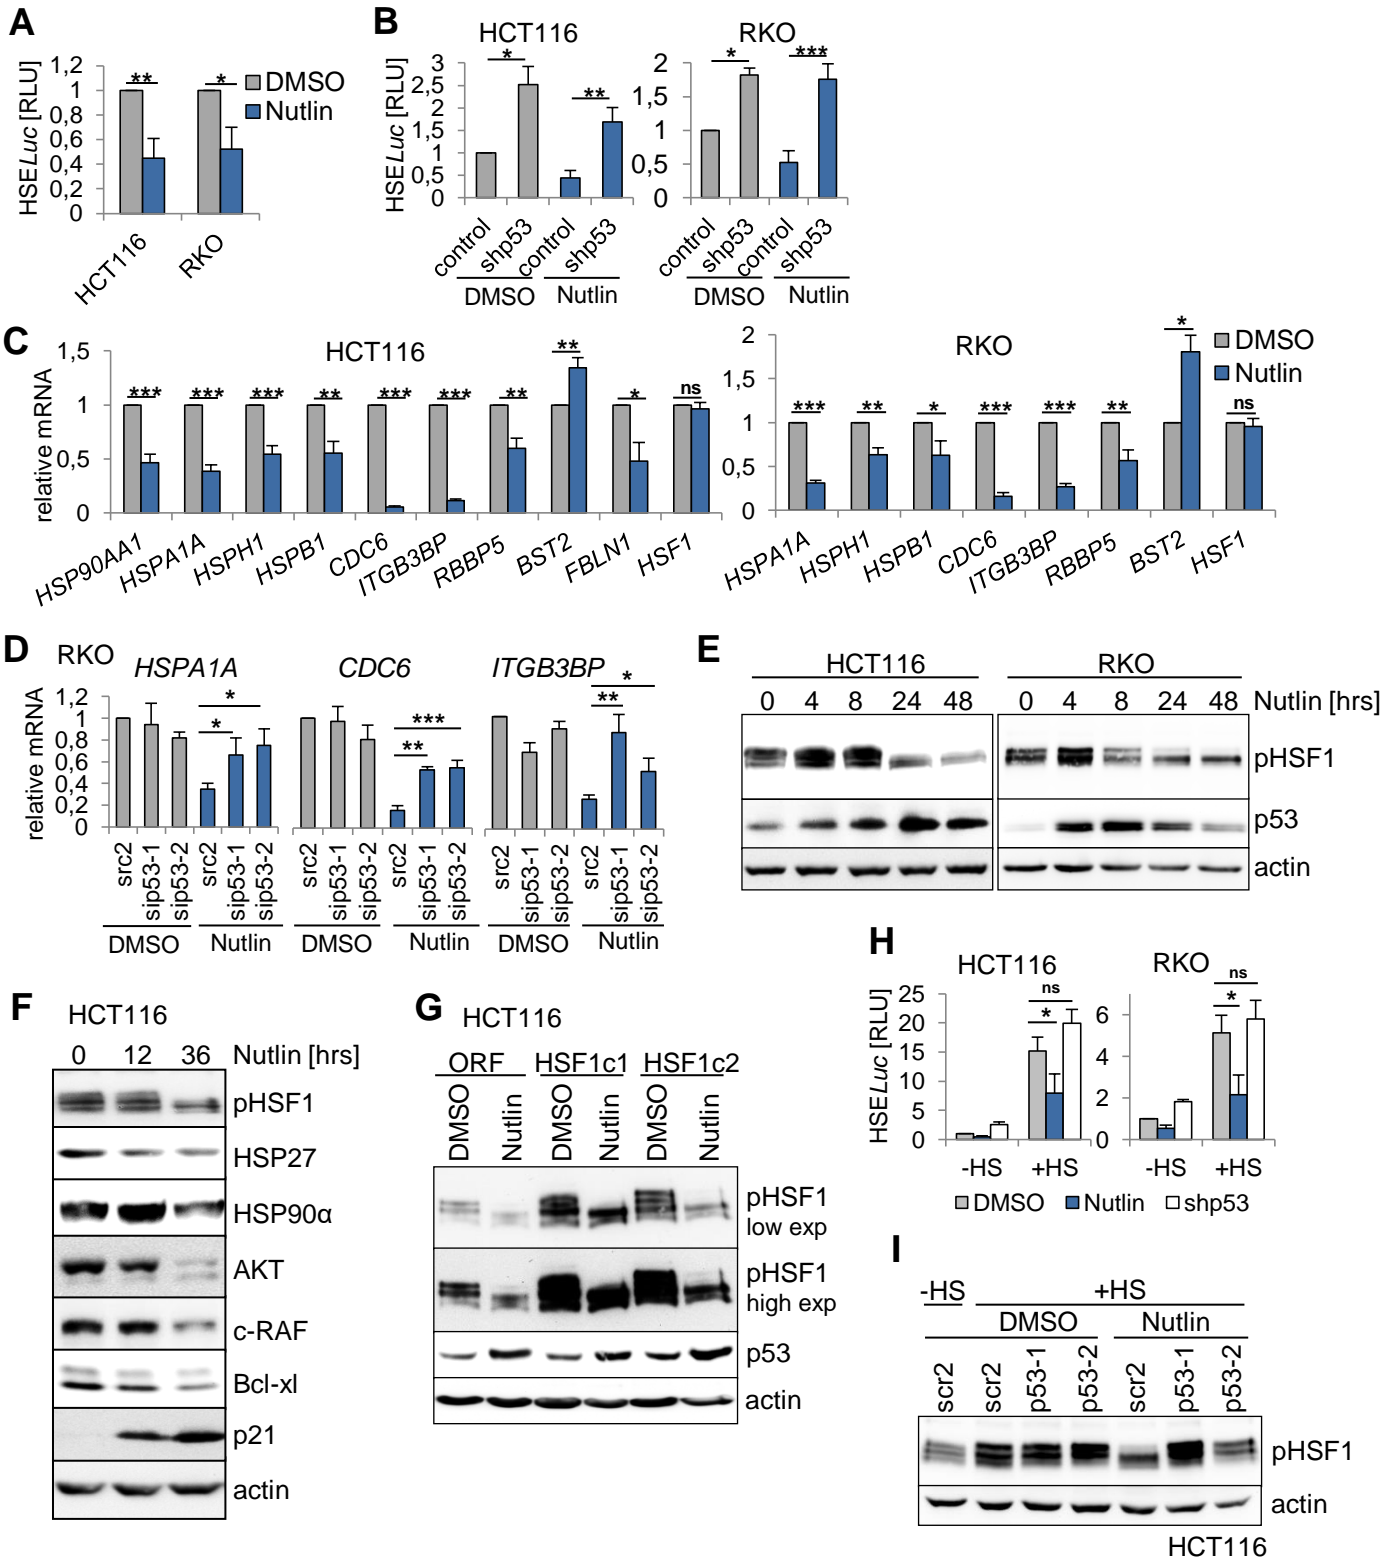

**Figure 3**

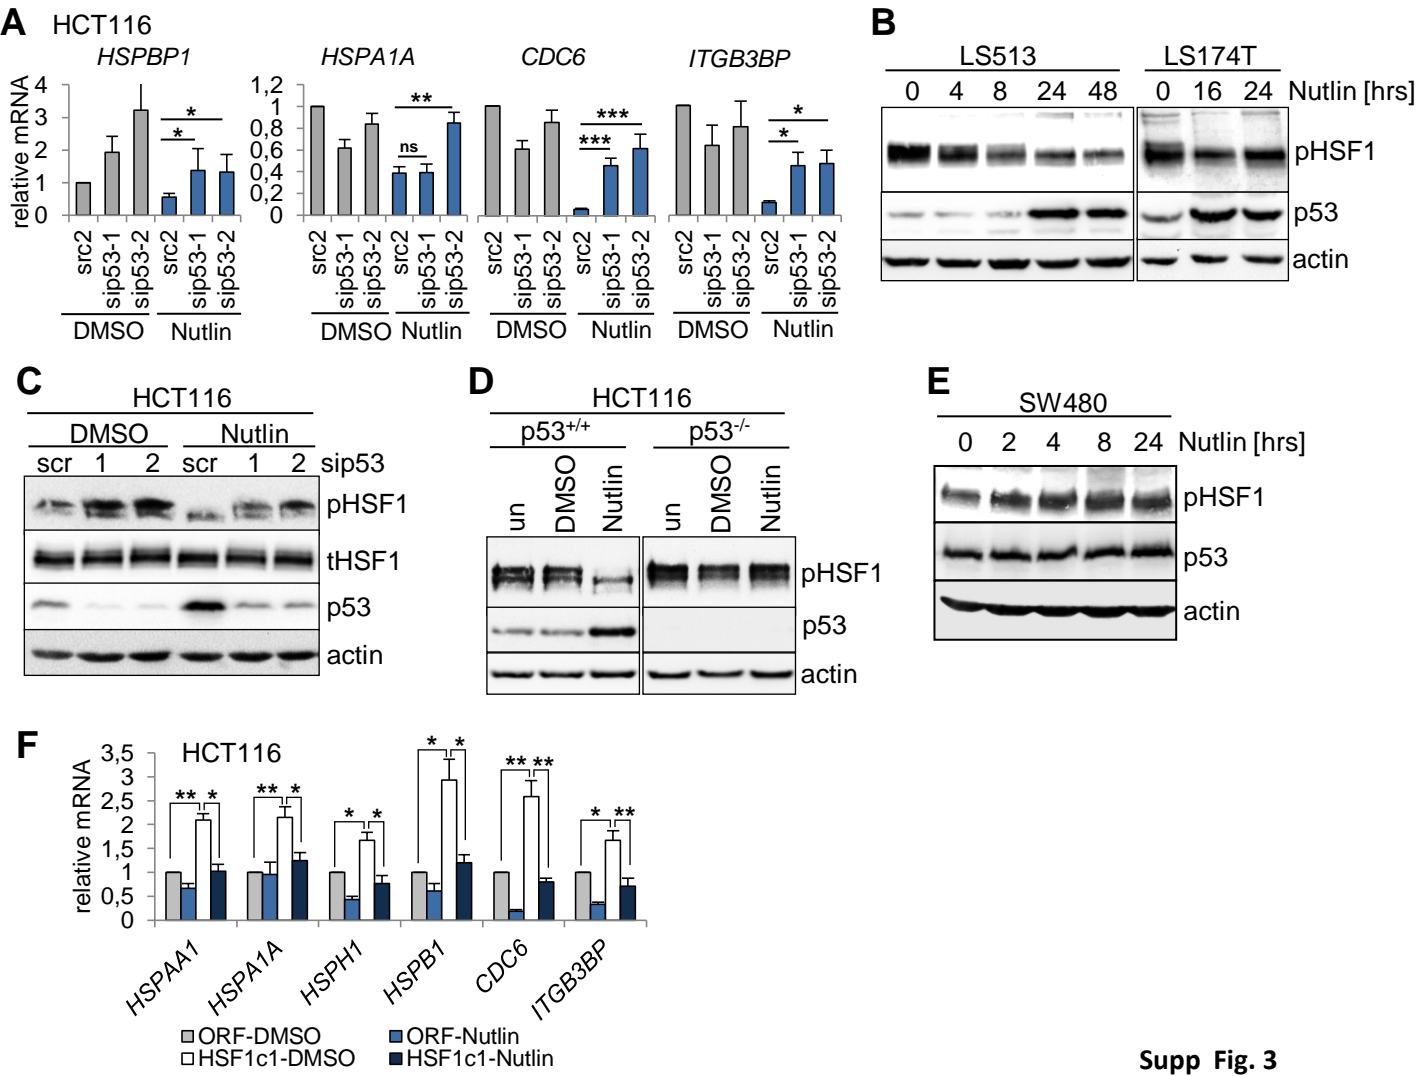

Supp Fig. 3

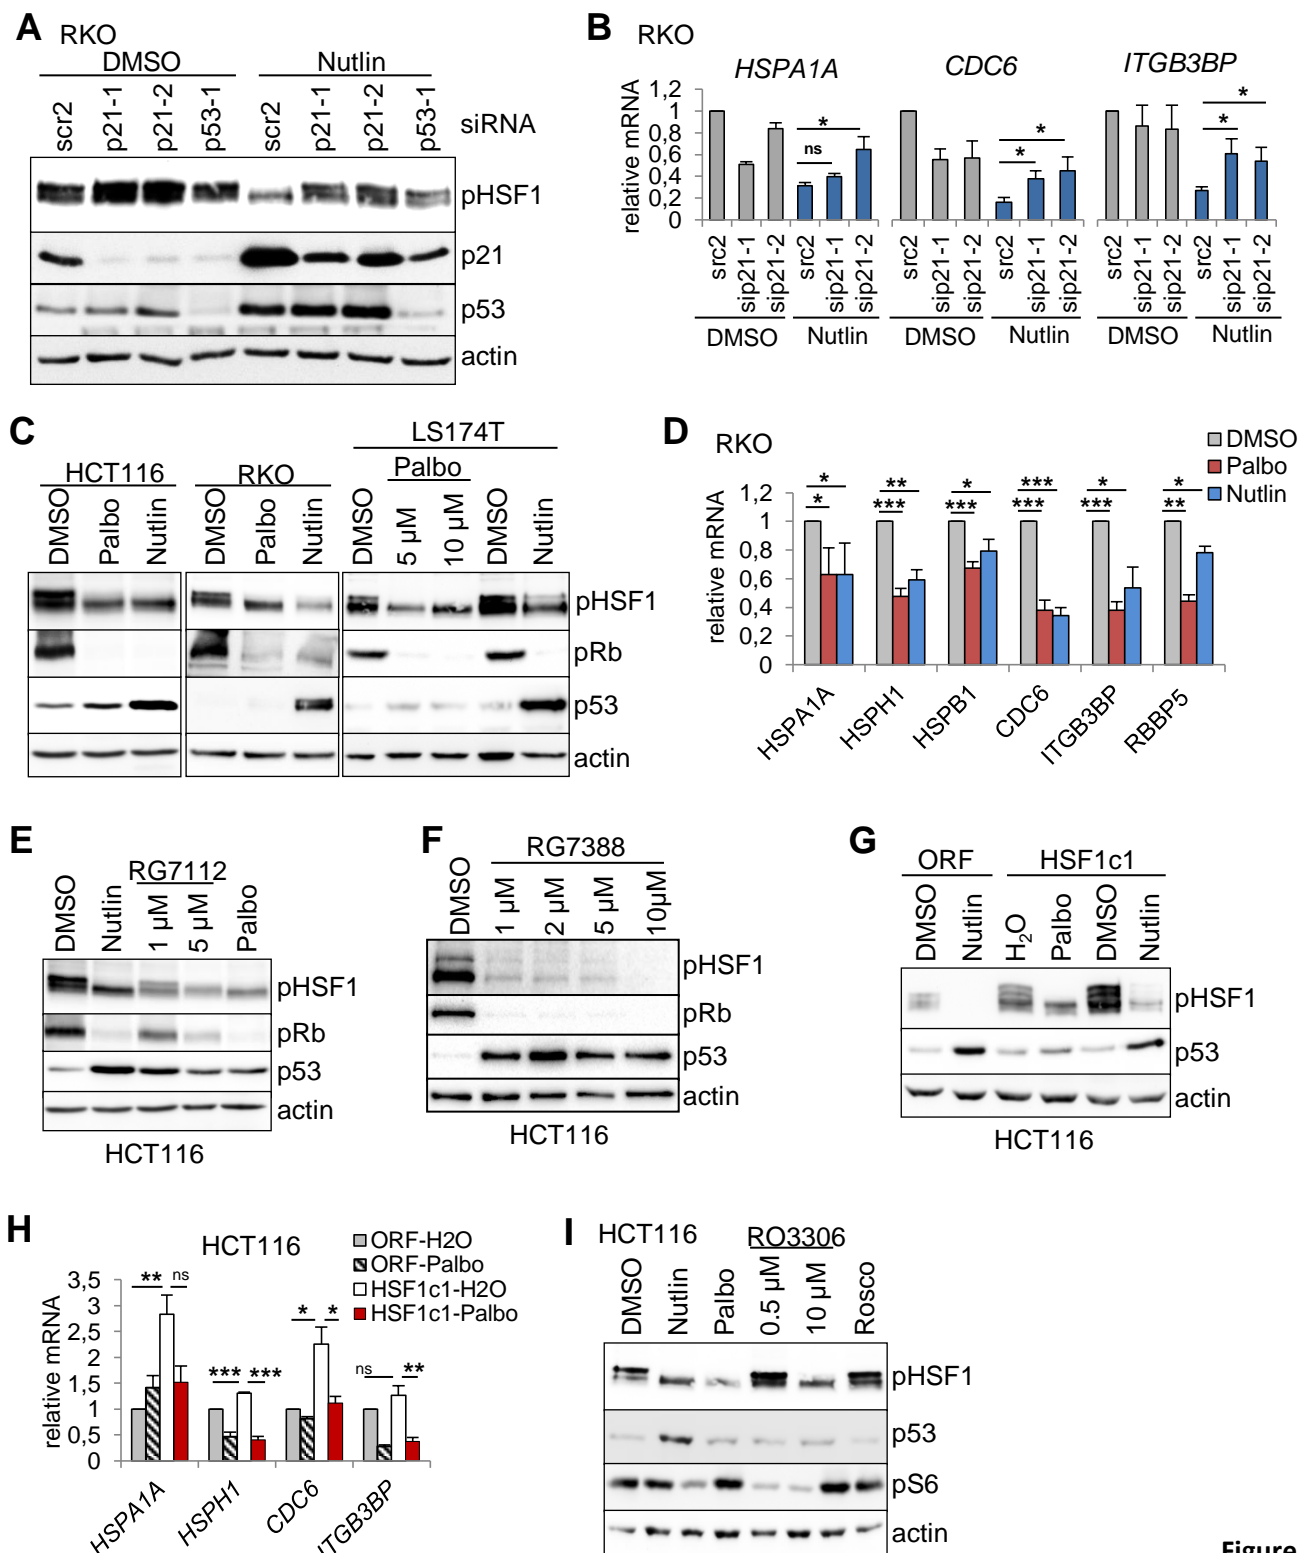

Figure 4



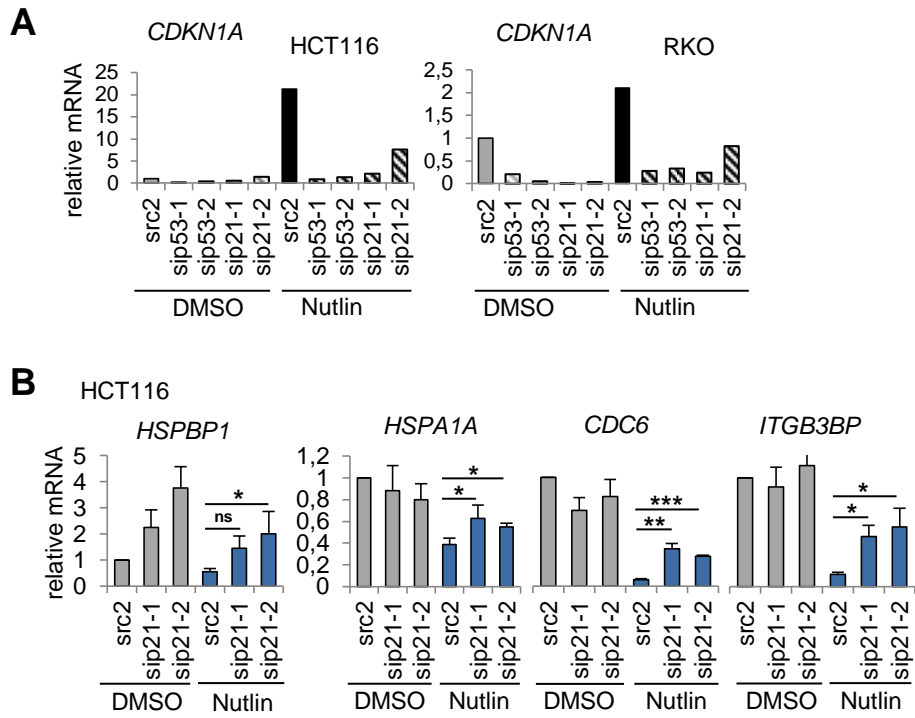

Supp Fig. 4

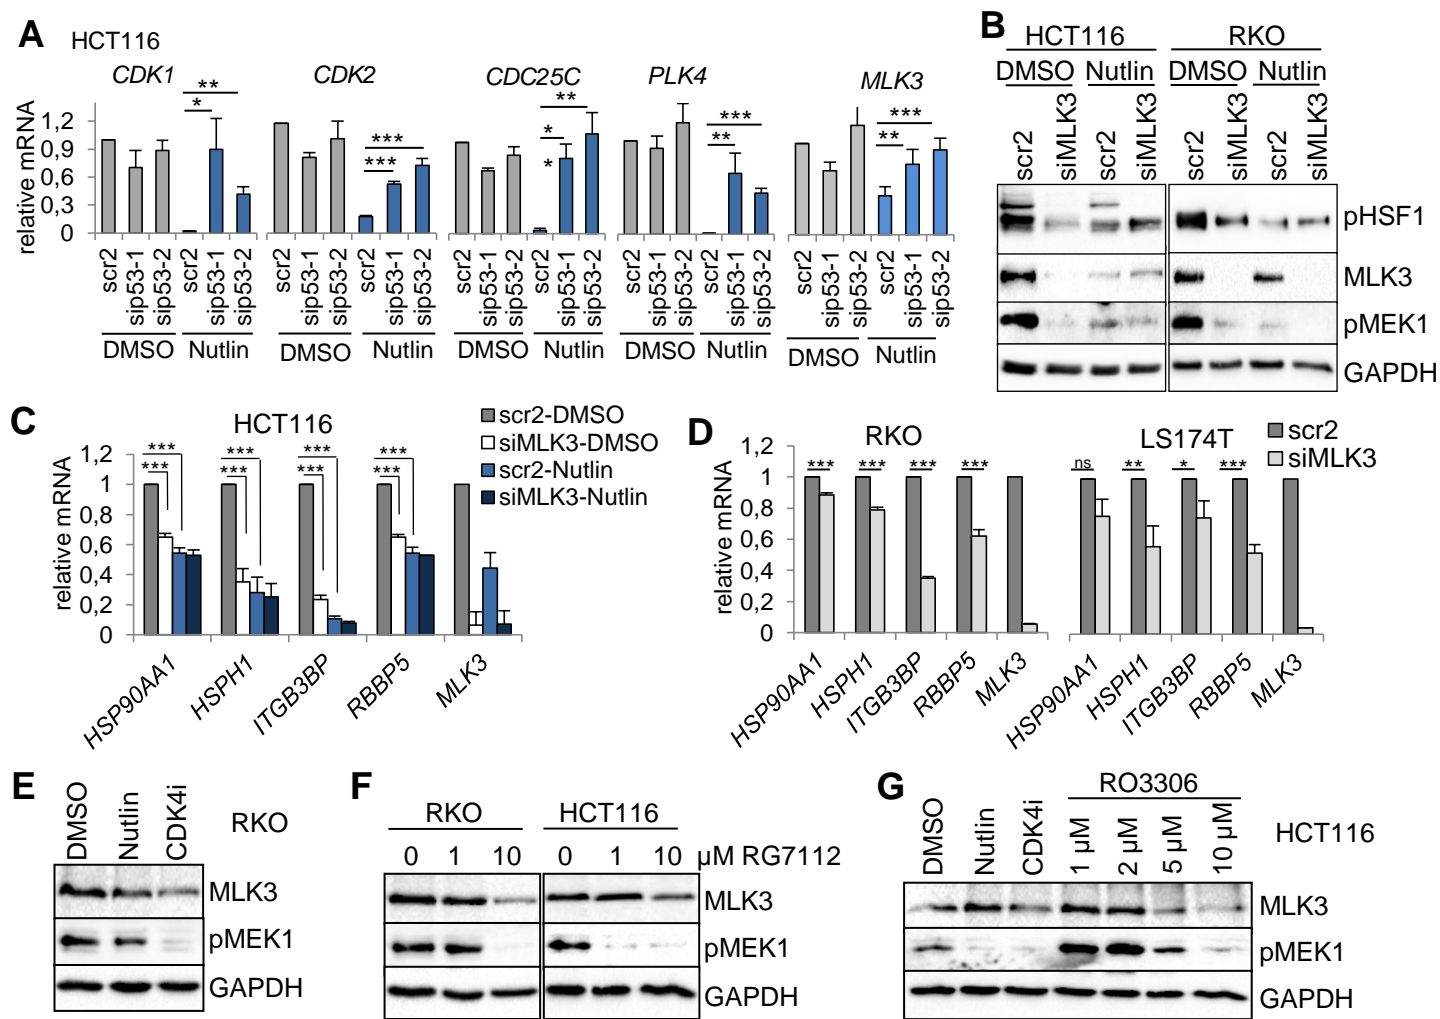

**Figure 5**

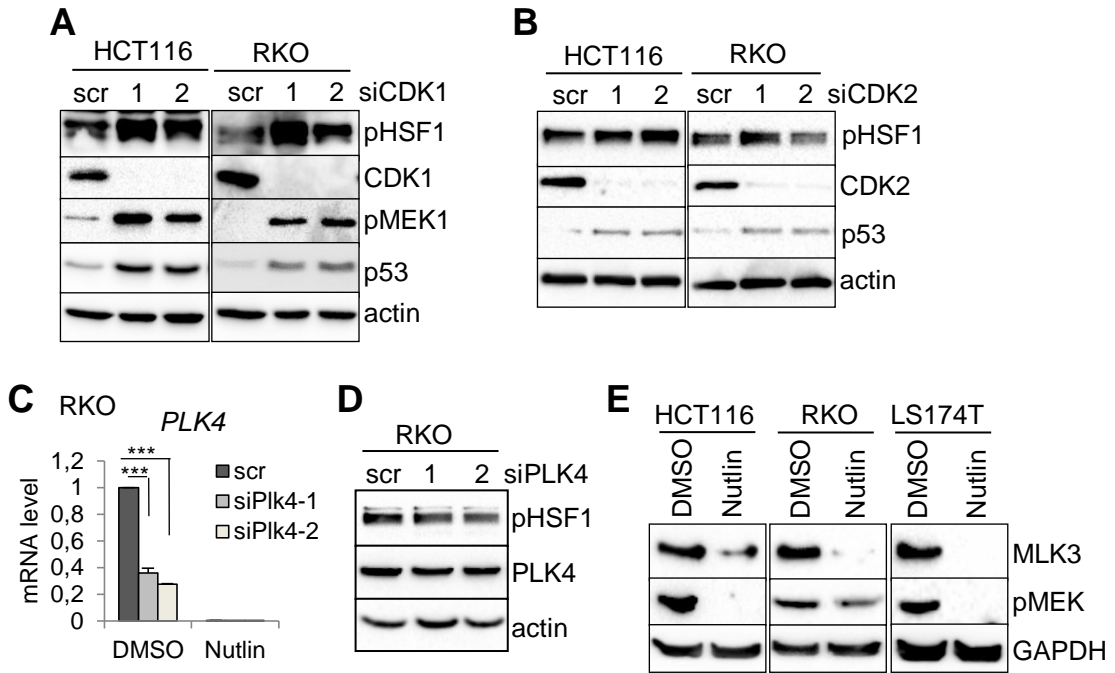

Supp Fig. 5

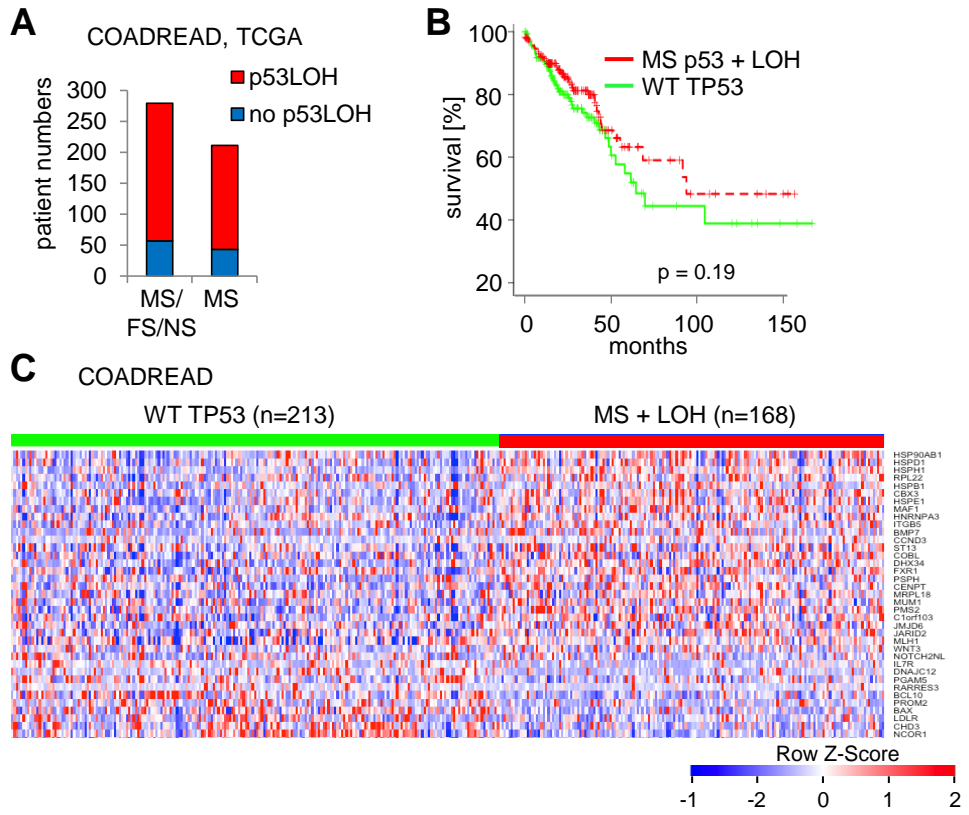

**Figure 6**

**A** COADREAD

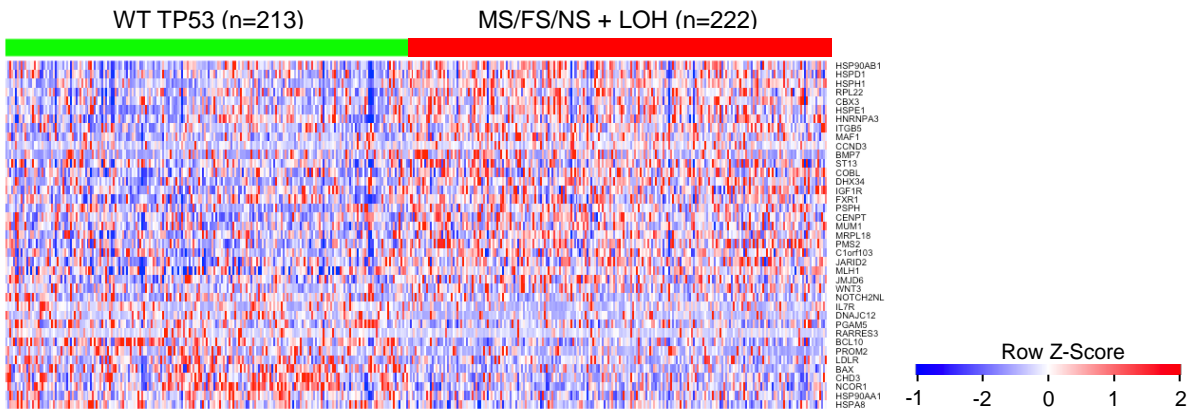

**B** BRCA

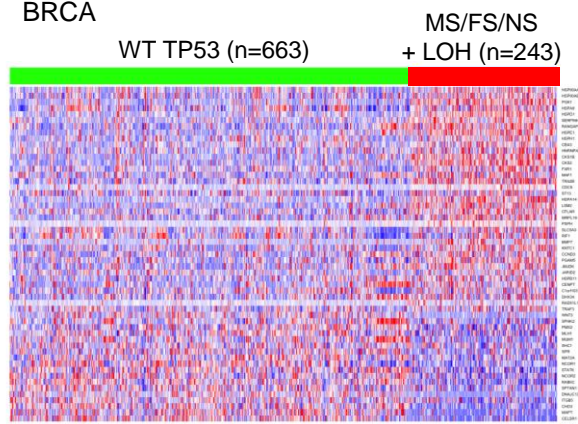

**C** BRCA

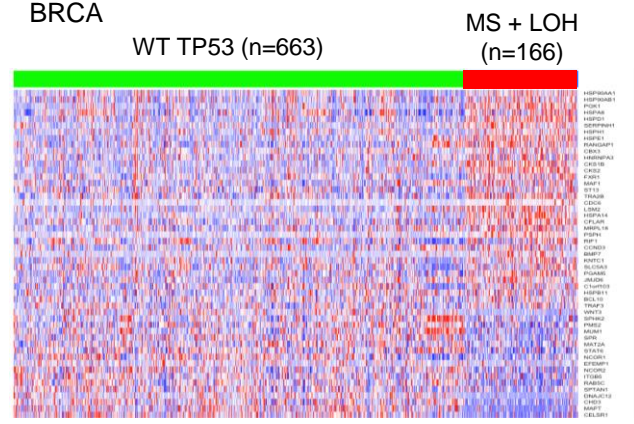

**D** MCF7

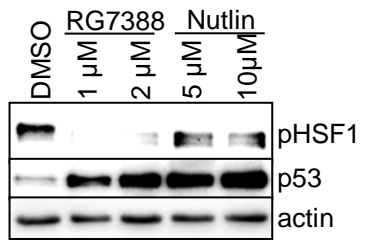

MDA-MB-231

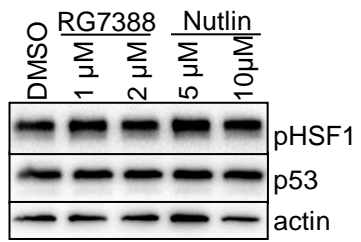

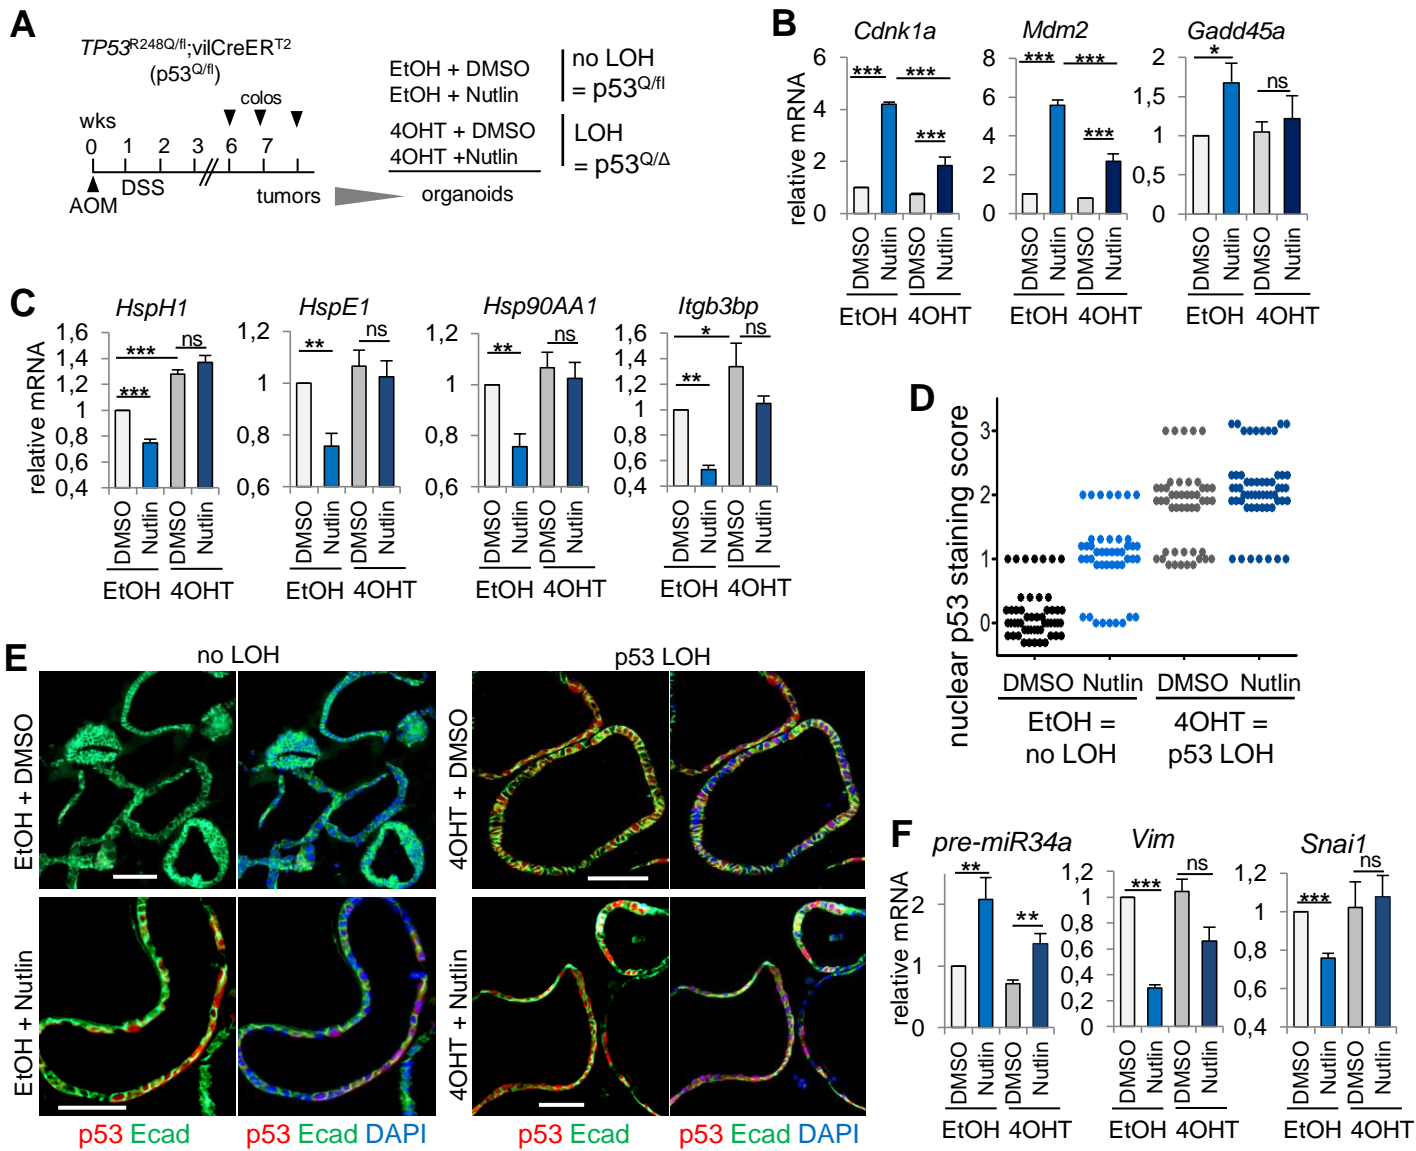

**Figure 7**

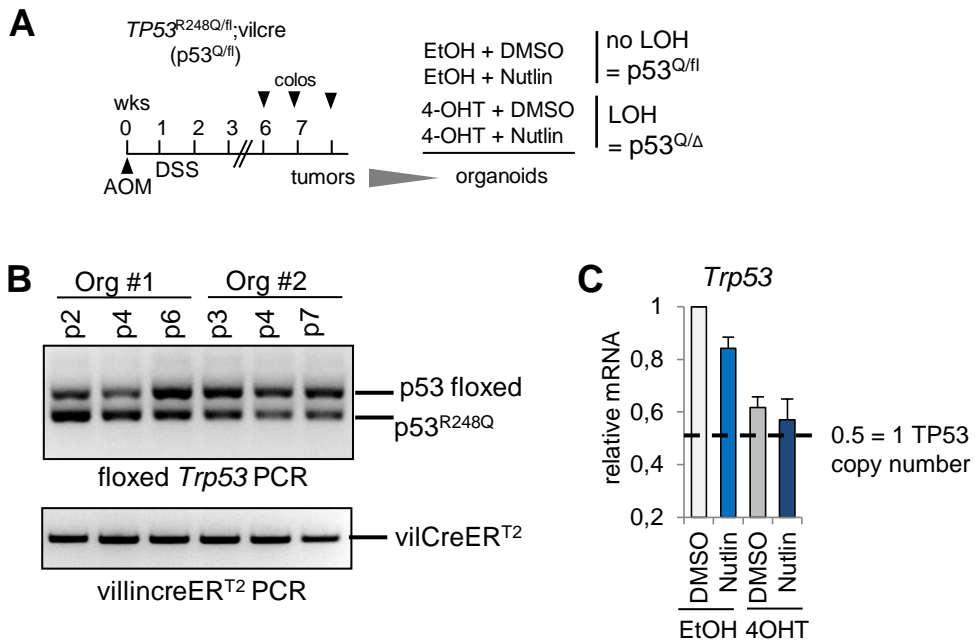

Supp Fig. 7
